# Supplementary material for: GranatumX: A Community-engaging, Modularized, and Flexible Webtool for Single-cell Data Analysis
Source: bioRxiv or medRxiv preprint supplement (doi:10.1101/385591), 2021-07-01

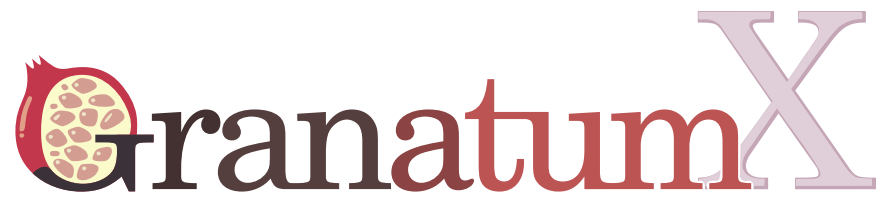

**Kim GSE73121**  
**(with DeepImpute)**  
**Analysis Report**

This report is generated by GranatumX

Please cite: Zhu, Xun et al. "Granatum: A Graphical Single-Cell RNA-Seq Analysis Pipeline for Genomics Scientists." *Genome Medicine* 9.1 (2017)

# Upload Files

Assay to upload: **assay.csv (17.07 MB)**

Sample metadata file to upload: **sample\_meta.csv (2.82 KB)**

File format: **"csv"**

The assay has **18283** genes and **91** samples.

The first few rows and columns:

```
0.0, 0.0, 0.0, 0.0, 0.0, 0.0, 0.0, 0.0, 0.0, 0.0
0.0, 0.0, 0.0, 5.853313427568552, 0.0, 0.0, 2.320501479664279, 0.0, 0.0, 0.0
0.0, 0.0, 0.0, 0.0, 0.0, 0.0, 3.83695943788012, 0.0, 0.0, 0.0
0.0, 0.0, 0.0, 0.0, 0.0, 0.0, 0.0, 0.0, 0.0, 0.0
0.0, 0.0, 0.0, 0.0, 0.0, 0.0, 0.0, 0.0, 0.0, 0.0
0.0, 0.0, 0.0, 0.0, 0.0, 0.0, 0.0, 0.0, 0.0, 0.0
0.0, 0.0, 0.0, 0.0, 0.0, 0.0, 0.0, 0.0, 0.0, 0.0
0.0, 0.0, 0.0, 3.9854805960385185, 0.0, 6.093811525239639, 1.7368977847225782, 0.0, 4.862837702635269,
3.7060242246373396, 5.1045206838043145, 0.0, 3.3791174307819216, 0.0, 0.0, 1.8114399614997911, 0.0
```

- Sample meta with name **sample\_id** is accepted (PDX\_pRCC\_SC\_29\_1887263, PDX\_mRCC\_SC\_01\_1887216, PDX\_pRCC\_SC\_28\_1887262, PDX\_pRCC\_SC\_94\_1887301, PDX\_mRCC\_SC\_79\_1887240, ... and 86 more entries).
- Sample meta with name **cell\_type** is accepted (PDX\_pRCC, PDX\_mRCC, PDX\_pRCC, PDX\_pRCC, PDX\_mRCC, ... and 86 more entries).

# DeepImpute

Random seed: **12345**

Use automatic gene imputation limit: **true**

Gene rank limit: **2000**

Cell subset: **1**

Assay: **[A]assay.csv** (from step 1: Upload Files)

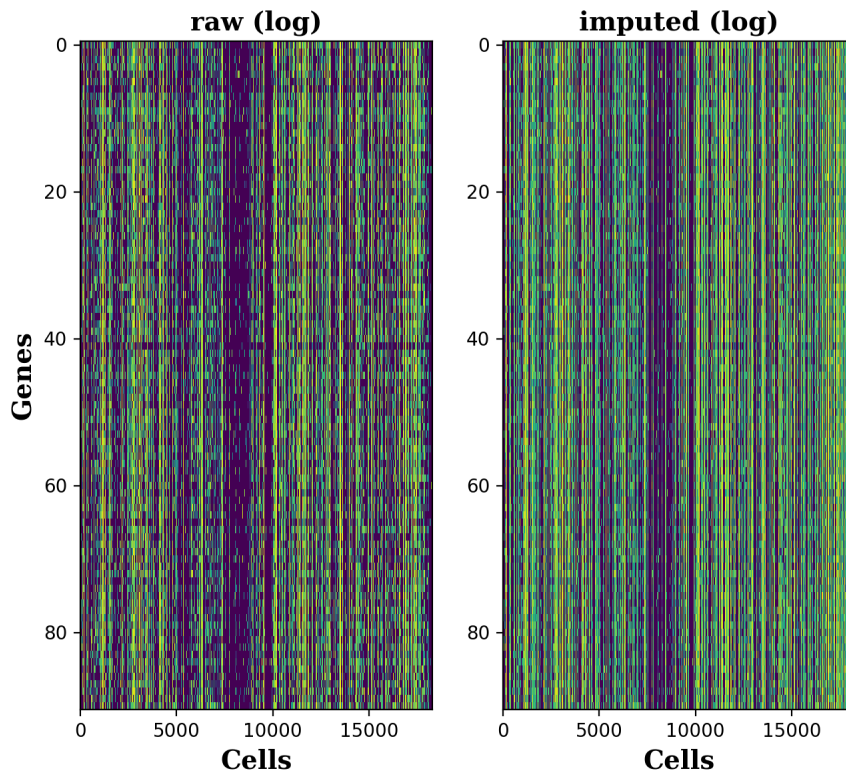

Heatmaps

#Imputed genes: **9062**

Dropout (before/after): 0.53/0.38

Accuracy (R2 score) on masked data: **0.37**

# Gene Filtering

The gene has to be expressed in at least \_\_\_ cells: **3**

The average expression level of the gene has to be greater than: **1**

The average expression level of the gene has to be less than: **999999**

The dispersion of the gene has to be greater than: **0.5**

The dispersion of the gene has to be less than: **999999**

Assay: **Imputed assay** (from step 2: DeepImpute)

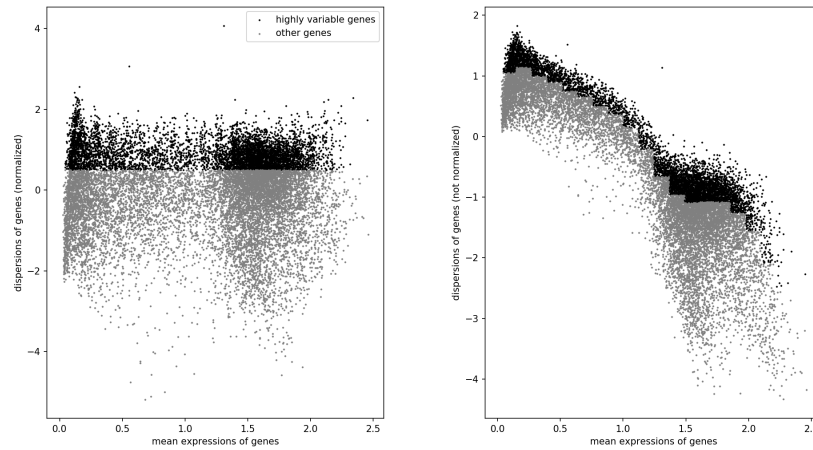

Each dot represent a gene. The gray dots are the removed genes. The x-axis is log-transformed.

Number of genes before filtering: **18283**

Number of genes after filtering: **5656**

# Cell Normalization

Number of cells to plot in the bar-plot: **40**

Assay: **Filtered Assay** (from step 3: Gene Filtering)

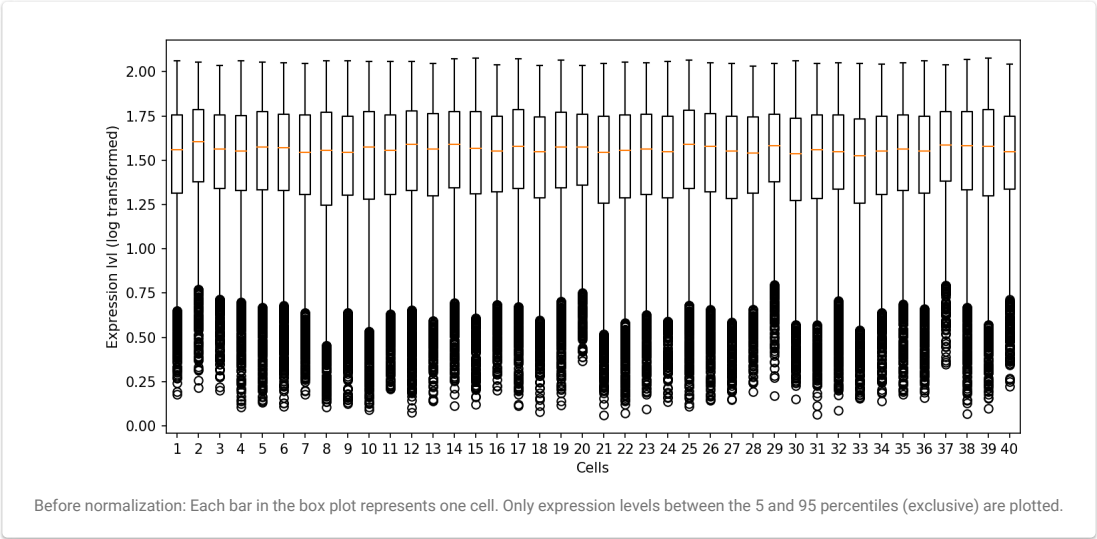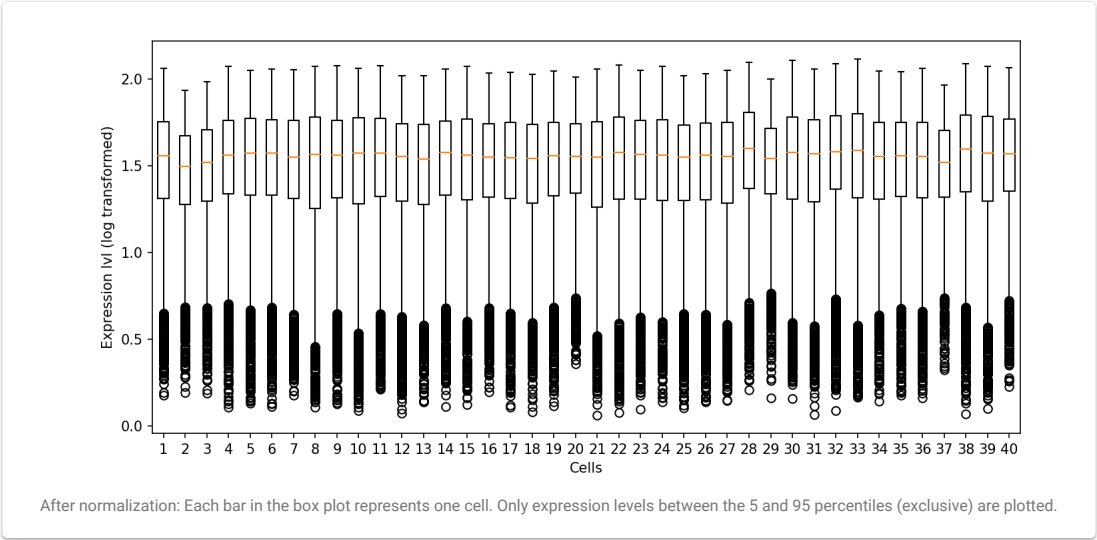

# Log transformation

The base used for the log function: **2**

The pseudo counts added before log transformation (to avoid getting  $\log(0)$ ): **1**

Assay including matrix and genets: **Normalized assay** (from step 4: Cell Normalization)

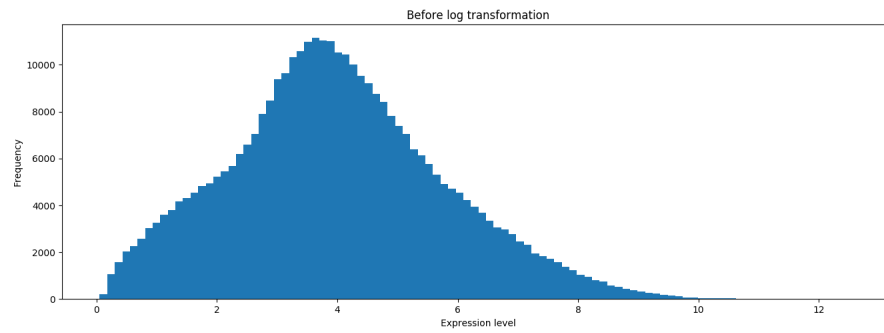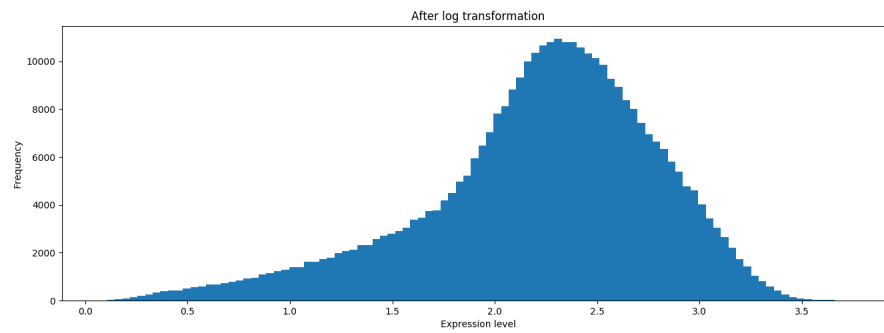

The distribution of expression level before and after log transformation. Only the values greater than the 5 percentile (usually zero in single-cell data) and lower than 95 percentile are considered.

# Principal Component Analysis

Number of top components to calculate: 2

Assay: **Log transformed assay** (from step 5: Log transformation)

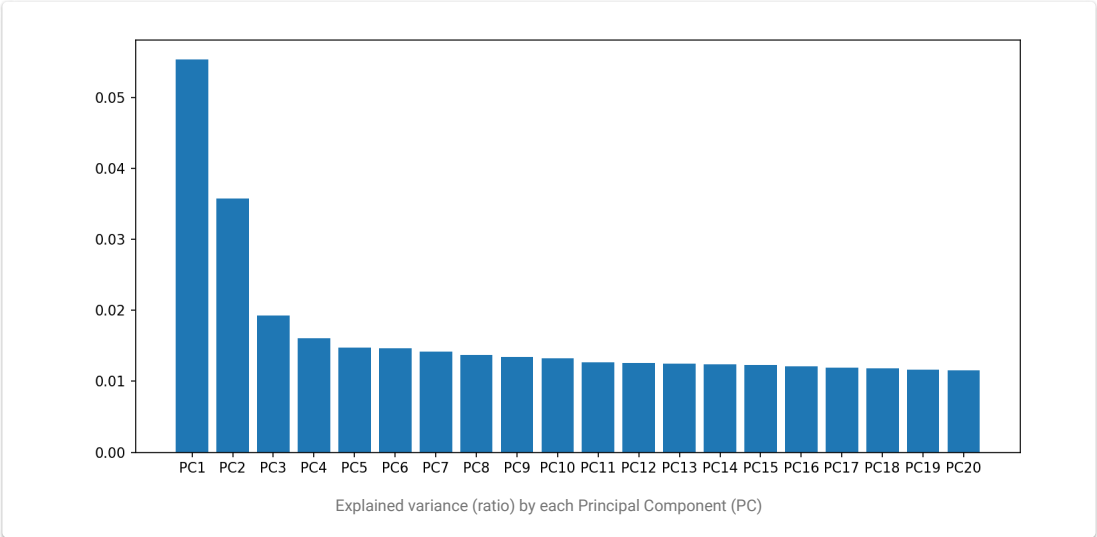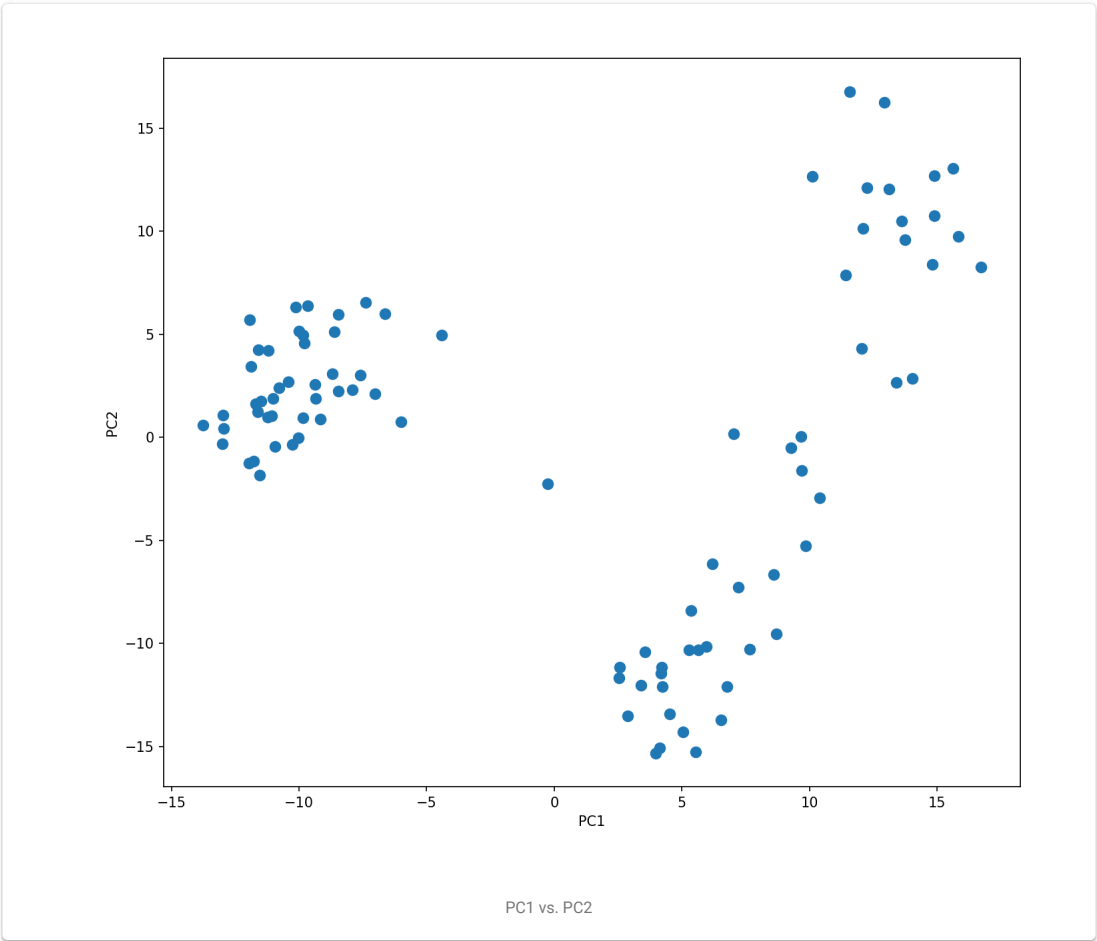

# t-Distributed Stochastic Neighbor Embedding

Random seed: 0

Assay: **Log transformed assay** (from step 5: Log transformation)

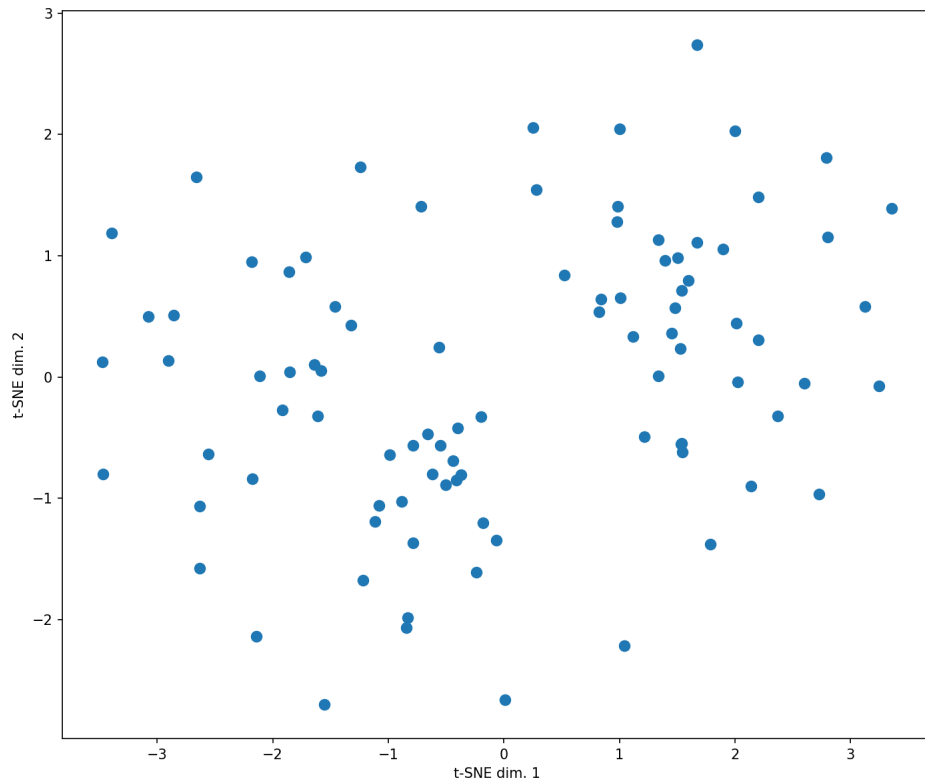

t-SNE plot: each dot represents a cell



# Clustering

Random seed: 0

Cell coordinates for visualization: **PC1 vs. PC2** (from step 6: Principal Component Analysis)

Assay including matrix and geneds: **Log transformed assay** (from step 5: Log transformation)

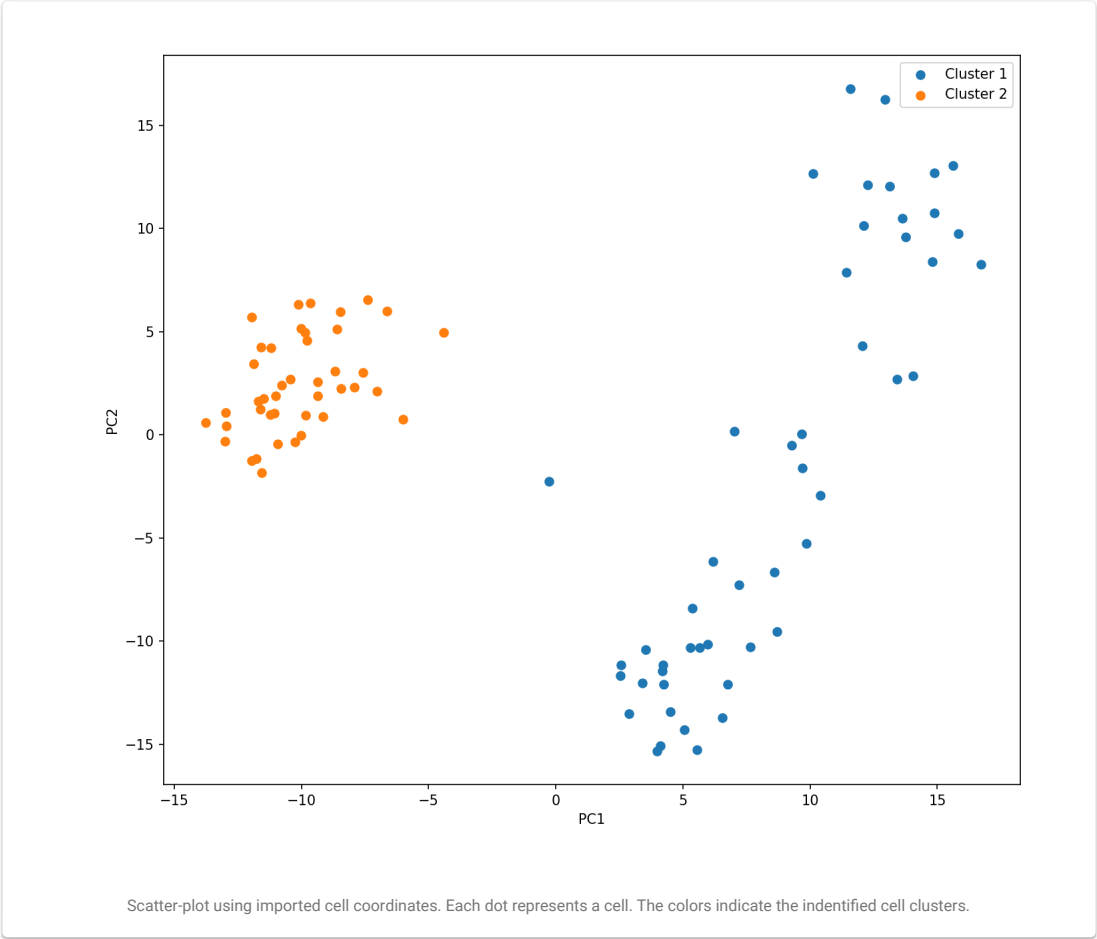

# Clustering Quality Measure

Predicted clusters: **Cluster assignment** (from step 8: Clustering)

True clusters: **[M]cell\_type** (from step 1: Upload Files)

Adjusted Rand score: **0.6747317963935174**

Adjusted mutual information score: **0.5994358709303271**

# Marker Genes Identification

Assay including matrix and genelds: **Log transformed assay** (from step 5: Log transformation)

Group vector: **[M]cell\_type** (from step 1: Upload Files)

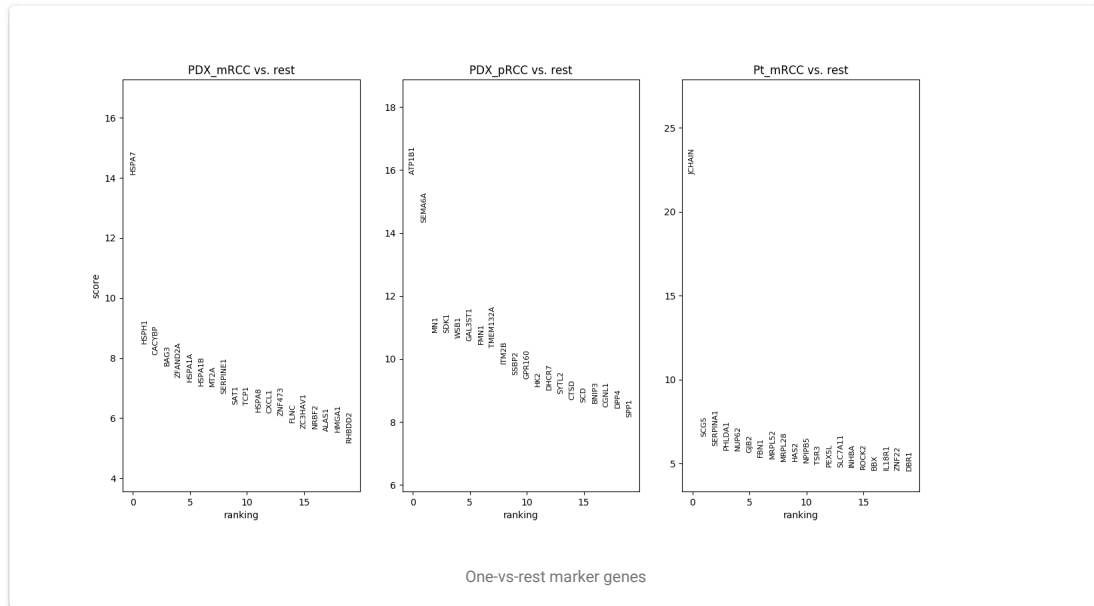

# Fast GSEA (R)

The species: **"human"**

The database for the enrichment analysis: **"KEGG"**

A list of genes with their scores: **Marker score (Pt\_mRCC vs. rest)** (from step 10: Marker Genes Identification)

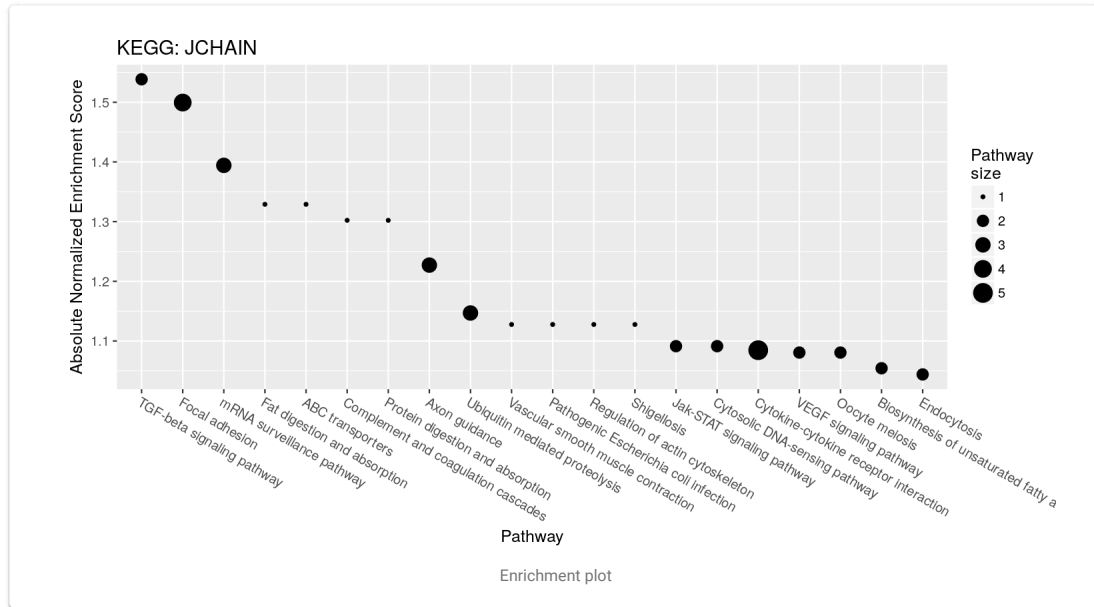

| Rank | Identifier                          | Score  |
|------|-------------------------------------|--------|
| 1    | TGF-beta signaling pathway          | 1.5385 |
| 2    | Focal adhesion                      | 1.4995 |
| 3    | mRNA surveillance pathway           | 1.3943 |
| 4    | Fat digestion and absorption        | 1.329  |
| 5    | ABC transporters                    | 1.329  |
| 6    | Complement and coagulation cascades | 1.3022 |
| 7    | Protein digestion and absorption    | 1.3021 |
| 8    | Axon guidance                       | 1.2271 |
| 9    | Ubiquitin mediated proteolysis      | 1.1469 |
| 10   | Vascular smooth muscle contraction  | 1.1277 |

PREVIOUS PAGE 1 / 9 NEXT PAGE

Enrichment table

---

# Fast GSEA (R)

The species: **"human"**

The database for the enrichment analysis: **"KEGG"**

A list of genes with their scores: **Marker score (PDX\_pRCC vs. rest)** (from step 10: Marker Genes Identification)

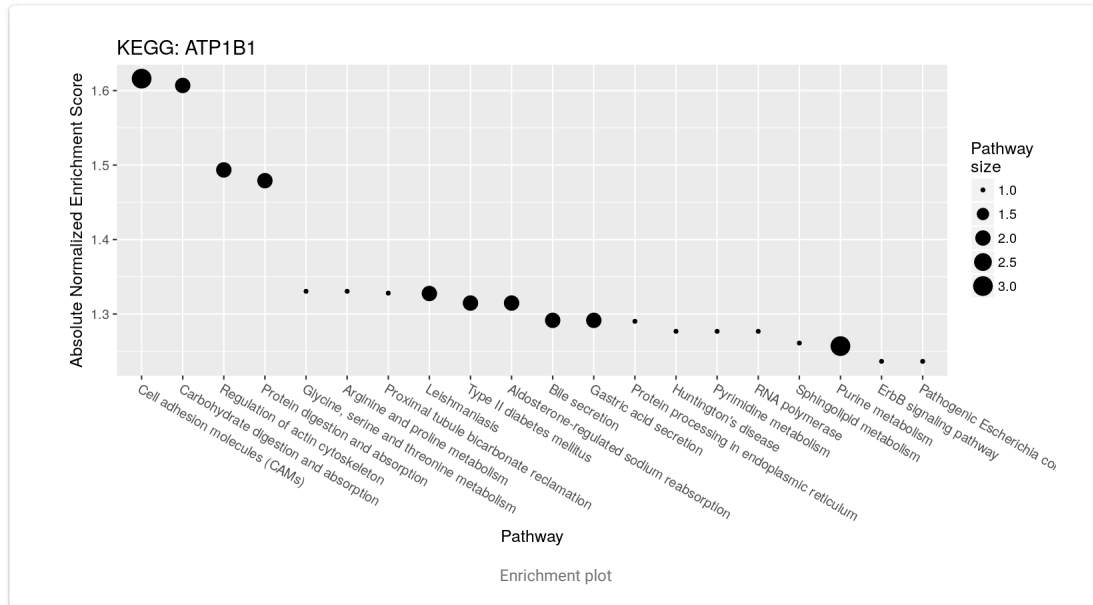

| Rank | Identifier                                | Score  |
|------|-------------------------------------------|--------|
| 1    | Cell adhesion molecules (CAMs)            | 1.616  |
| 2    | Carbohydrate digestion and absorption     | 1.6069 |
| 3    | Regulation of actin cytoskeleton          | 1.4935 |
| 4    | Protein digestion and absorption          | 1.4791 |
| 5    | Glycine, serine and threonine metabolism  | 1.3305 |
| 6    | Arginine and proline metabolism           | 1.3305 |
| 7    | Proximal tubule bicarbonate reclamation   | 1.3281 |
| 8    | Leishmaniasis                             | 1.3275 |
| 9    | Type II diabetes mellitus                 | 1.3147 |
| 10   | Aldosterone-regulated sodium reabsorption | 1.3147 |

PREVIOUS PAGE 1 / 8 NEXT PAGE

Enrichment table

---

# Fast GSEA (R)

The species: **"human"**

The database for the enrichment analysis: **"KEGG"**

A list of genes with their scores: **Marker score (PDX\_mRCC vs. rest)** (from step 10: Marker Genes Identification)

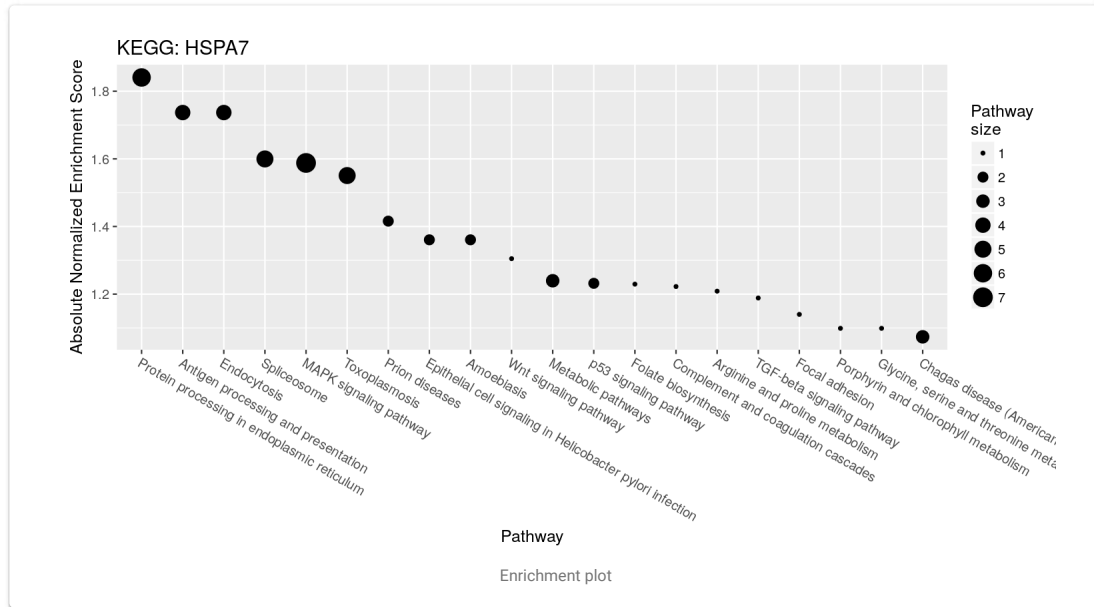

| Rank | Identifier                                                 | Score  |
|------|------------------------------------------------------------|--------|
| 1    | Protein processing in endoplasmic reticulum                | 1.8406 |
| 2    | Antigen processing and presentation                        | 1.7369 |
| 3    | Endocytosis                                                | 1.7369 |
| 4    | Spliceosome                                                | 1.5998 |
| 5    | MAPK signaling pathway                                     | 1.5879 |
| 6    | Toxoplasmosis                                              | 1.5506 |
| 7    | Prion diseases                                             | 1.4158 |
| 8    | Epithelial cell signaling in Helicobacter pylori infection | 1.3607 |
| 9    | Amoebiasis                                                 | 1.3607 |
| 10   | Wnt signaling pathway                                      | 1.3049 |

PREVIOUS PAGE 1 / 5 NEXT PAGE

Enrichment table



---

# Pseudo-time construction

Random seed: 0

The sample metadata for cell coloring in plot: **[M]cell\_type** (from step 1: Upload Files)

The assay to use for pseudo-time cell ordering: **Log transformed assay** (from step 5: Log transformation)

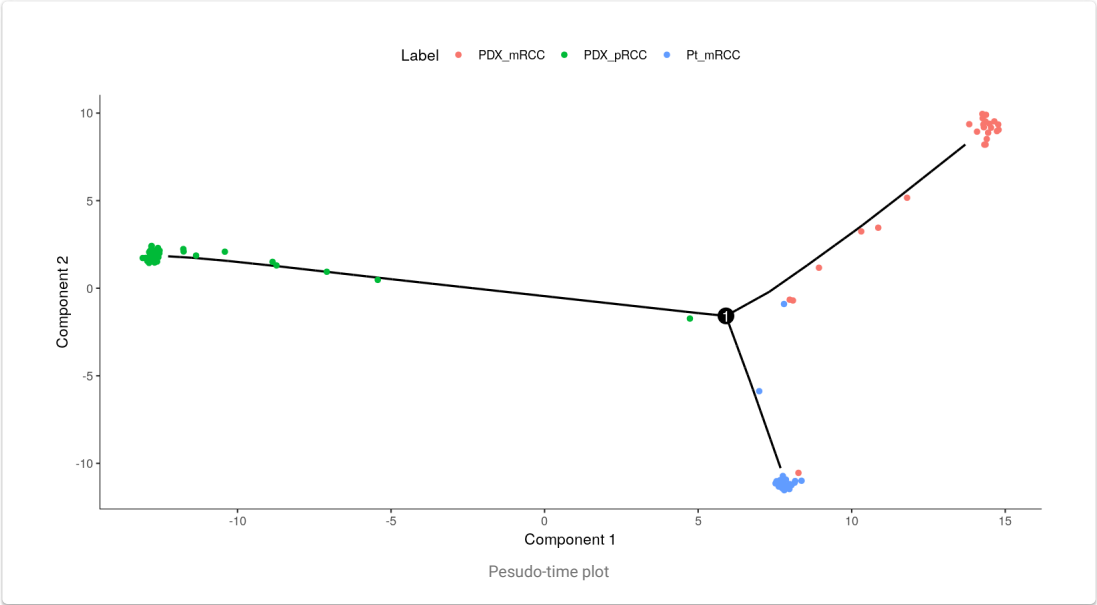

Supplement: Supplementary file [file 385591-1.pdf]
