# Supplementary material for: GranatumX: A Community-engaging, Modularized, and Flexible Webtool for Single-cell Data Analysis
Source: bioRxiv or medRxiv preprint supplement (doi:10.1101/385591), 2021-07-01
Supplement: Supplementary file [file media-1.pdf]

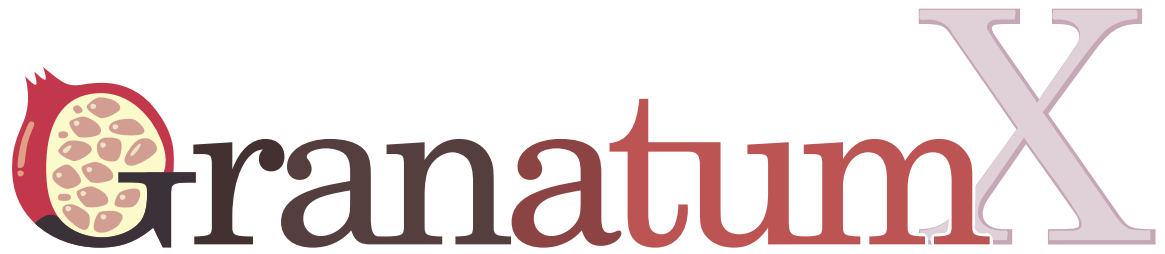

# Supplementary

# File 1

## Analysis Report

This report is generated by GranatumX

Please cite: Zhu, Xun, et al. "GranatumX: A community engaging and flexible software environment for single-cell analysis." *bioRxiv* (2018): 385591.

This is the pipeline to replicate Supplementary file 1 with GSE117988 data

# Upload Files 1.0.0

Assay to upload: **GSE117988\_raw.expMatrix\_Tumor.csv.zip (12.91 MB)**

File format: **"zip"**

Convert gene IDs: **false**

Species: **"human"**

Convert gene IDs into (HGNC symbol is recommended): **"symbol"**

Add extra info (from BioMart) into gene metadata: **true**

Enter your email address to get notified of any errors encountered in the pipeline: **false**

The assay has **21861** genes (with inferred ID type: Symbol) and **7431** samples.

The first few rows and columns:

```
0.0, 0.0, 0.0, 0.0, 0.0, 0.0, 0.0, 0.0, 0.0, 0.0
1.0, 0.0, 0.0, 0.0, 0.0, 0.0, 0.0, 0.0, 0.0, 0.0
0.0, 0.0, 0.0, 0.0, 0.0, 0.0, 0.0, 0.0, 0.0, 0.0
0.0, 0.0, 0.0, 0.0, 0.0, 0.0, 0.0, 0.0, 0.0, 0.0
0.0, 0.0, 0.0, 0.0, 0.0, 0.0, 0.0, 0.0, 0.0, 0.0
0.0, 0.0, 0.0, 0.0, 0.0, 0.0, 0.0, 0.0, 0.0, 0.0
0.0, 0.0, 1.0, 0.0, 1.0, 0.0, 0.0, 0.0, 0.0, 0.0
0.0, 0.0, 0.0, 0.0, 0.0, 0.0, 0.0, 1.0, 0.0, 0.0
0.0, 0.0, 0.0, 0.0, 0.0, 0.0, 0.0, 0.0, 0.0, 0.0
0.0, 0.0, 0.0, 0.0, 0.0, 0.0, 0.0, 0.0, 0.0, 0.0
```

- Finished upload step in 239.38 seconds\*

# DeepImpute 2.0.0

Random seed: **12345**

Use automatic gene imputation limit: **true**

Gene rank limit: **2000**

Cell subset: **1**

Assay: **[A]GSE117988\_raw.expMatrix\_Tumor.csv.zip** (from step 1: Upload Files 1.0.0)

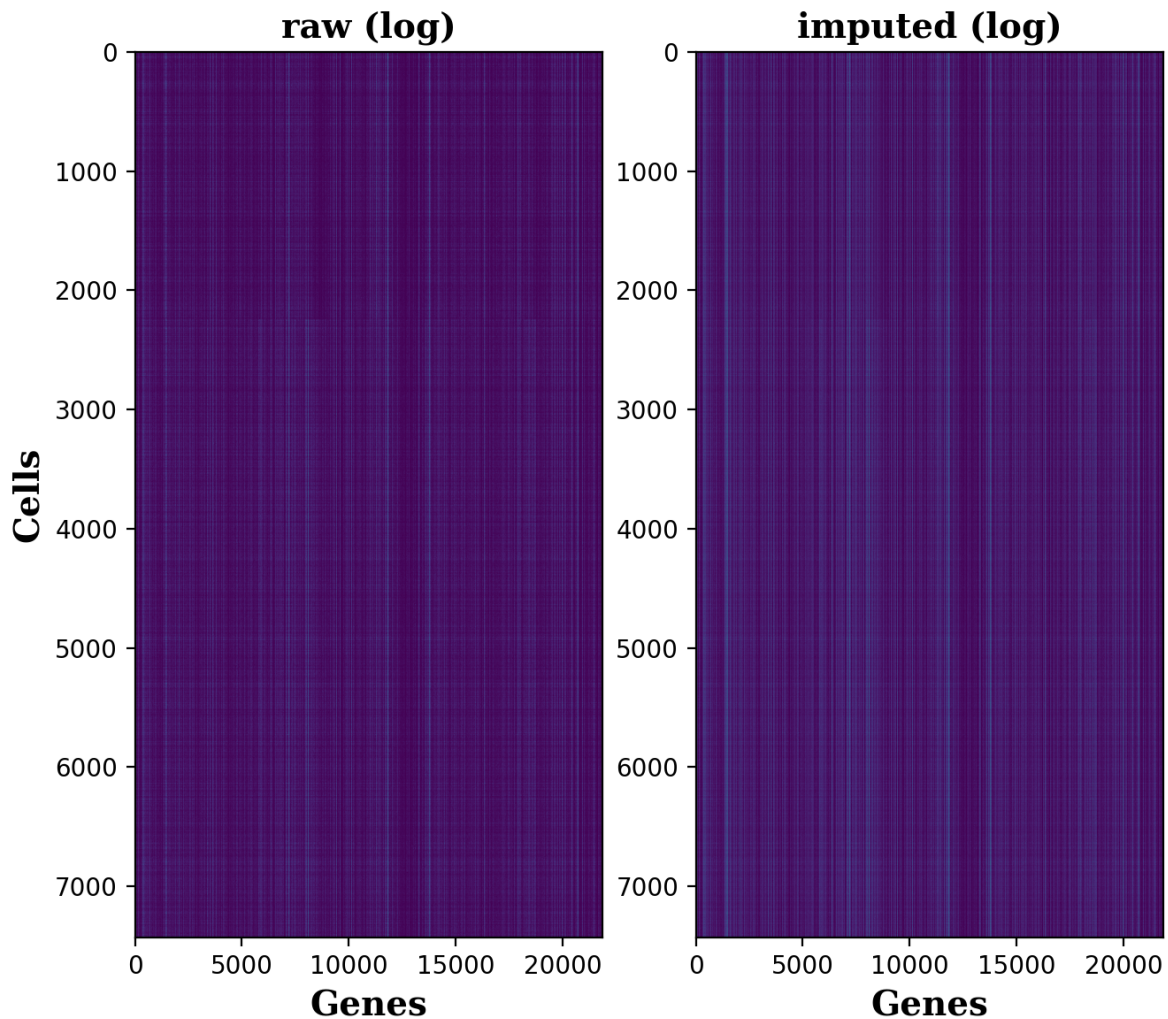

Heatmaps

- Data frame number of rows: **7431**
- Data frame number of columns: **21861**
- Number of imputed genes: **1536**

- Percentage of dropout entries *before* imputation: **92.70%**
- Percentage of dropout entries *after* imputation: **89.11%**
- Accuracy (correlation) on masked data: **0.92**

# Cell Normalization 1.0.0

Log transform in the boxplots: **false**

Normalization method: **"quantile"**

Number of cells to plot in the bar-plot: **40**

Assay: **Imputed assay** (from step 2: DeepImpute 2.0.0)

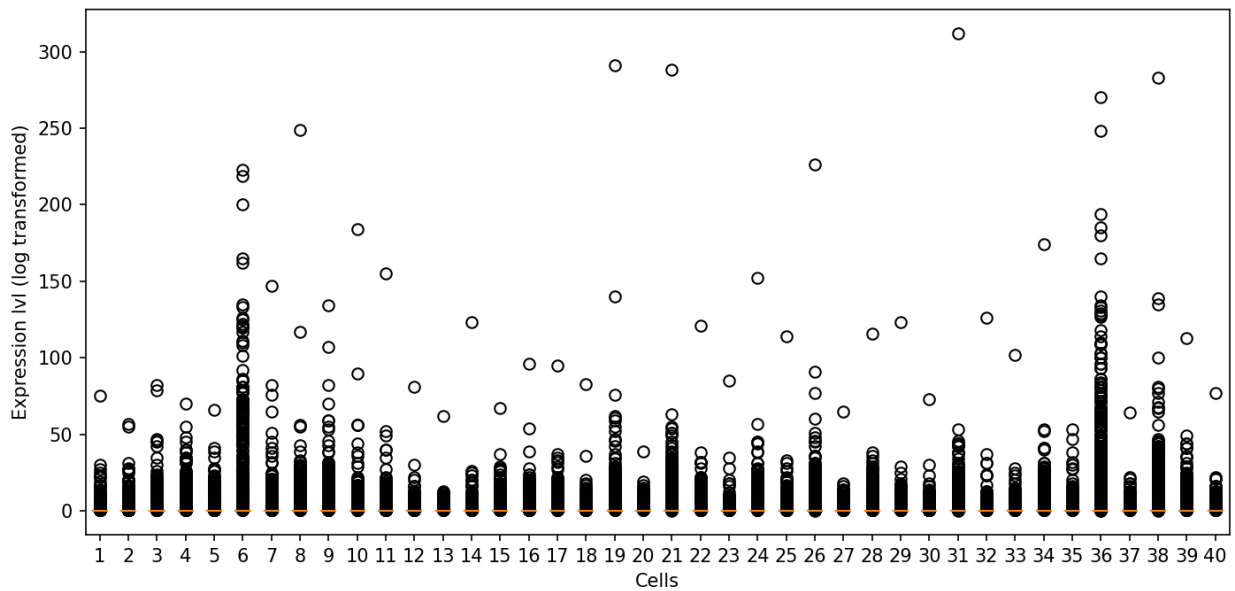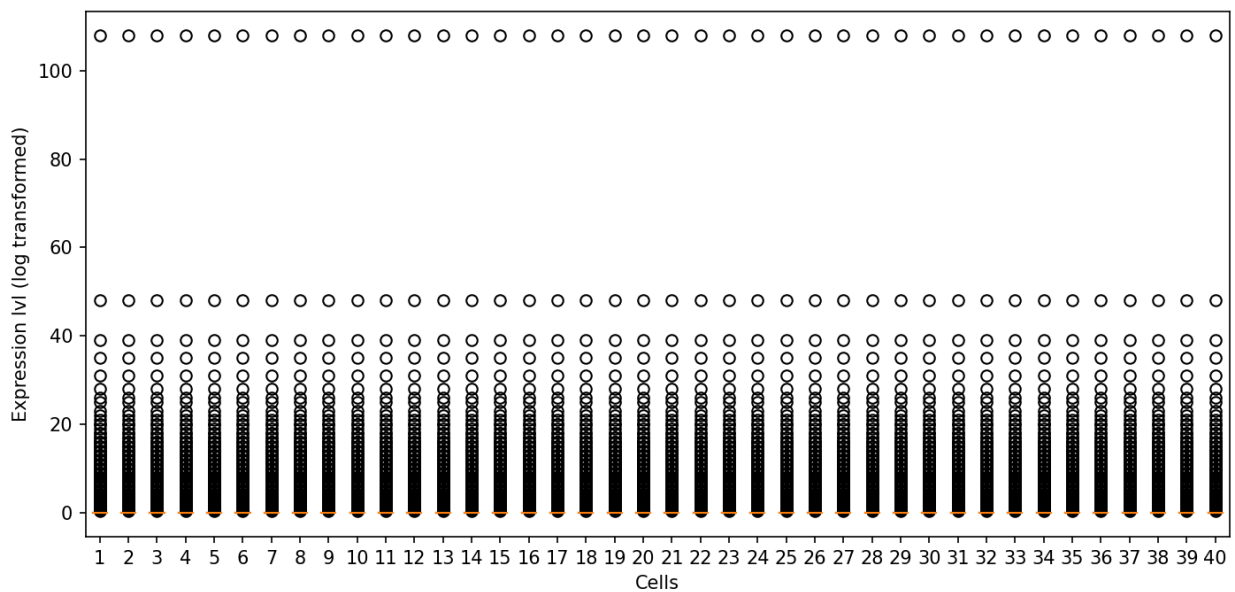

# Scanpy Gene Filtering 1.0.0

The gene has to be expressed in at least \_\_\_ cells: **3**

The average expression level of the gene has to be greater than: **1**

The average expression level of the gene has to be less than: **999999**

The dispersion of the gene has to be greater than: **0.5**

The dispersion of the gene has to be less than: **999999**

Assay: **Normalized assay** (from step 3: Cell Normalization 1.0.0)

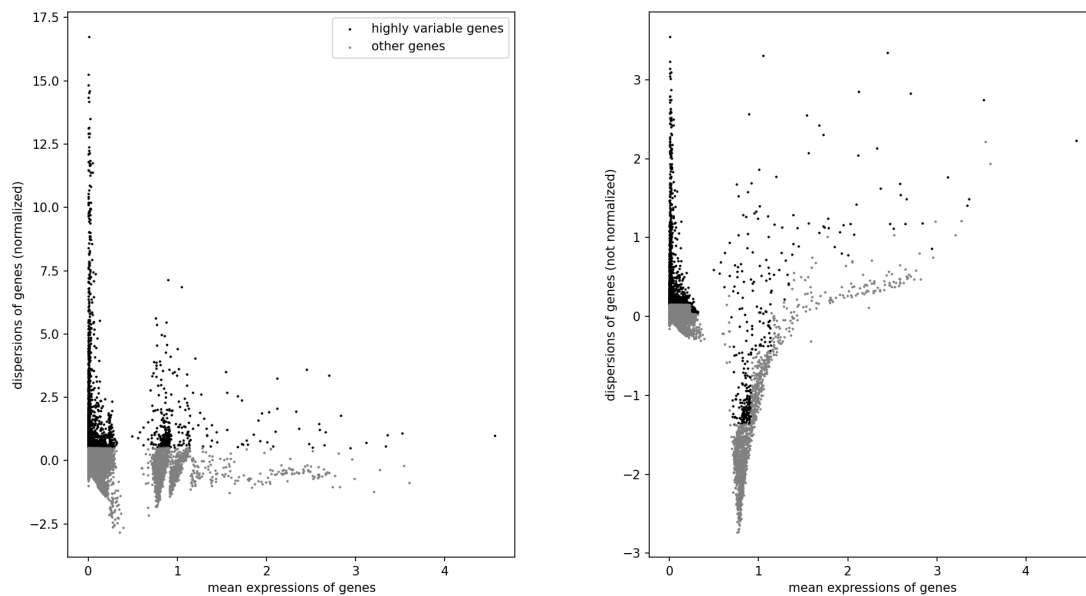

Each dot represent a gene. The gray dots are the removed genes. The x-axis is log-transformed.

Number of genes before filtering: **21861**

Number of genes after filtering: **1594**

# Log transformation 1.0.0

The base used for the log function: **2**

The pseudo counts added before log transformation (to avoid getting  $\log(0)$ ): **1**

Assay including matrix and genelds: **Filtered Assay** (from step 4: Scanpy Gene Filtering 1.0.0)

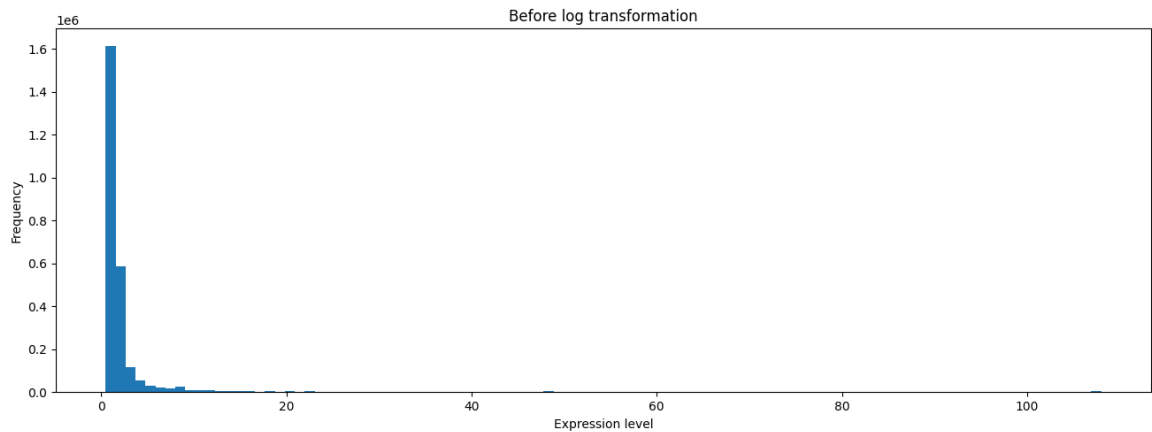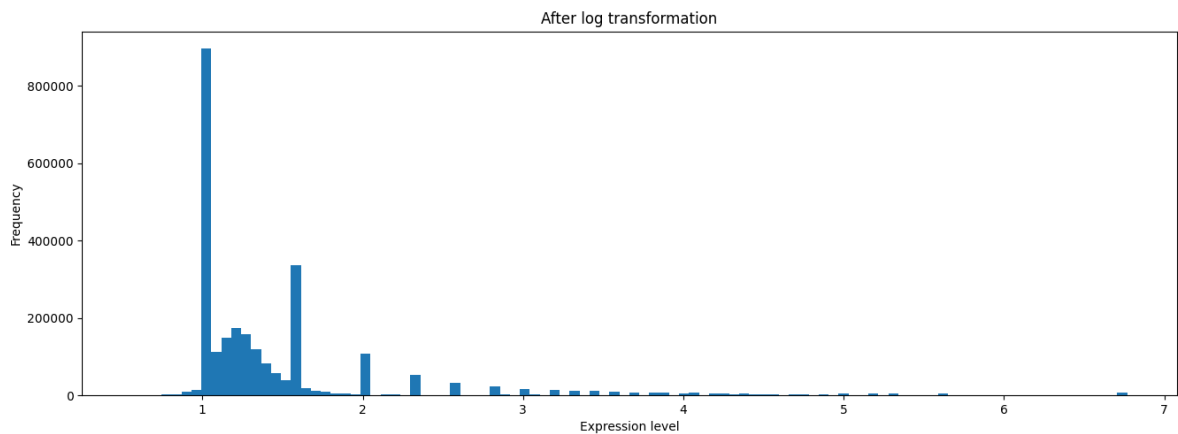

The distribution of expression level before and after log transformation. Only the values greater than the 5 percentile (usually zero in single-cell data) and lower than 95 percentile are considered.

# Principal Component Analysis 1.0.0

Number of top components to calculate: **2**

Assay: **Log transformed assay** (from step 5: Log transformation 1.0.0)

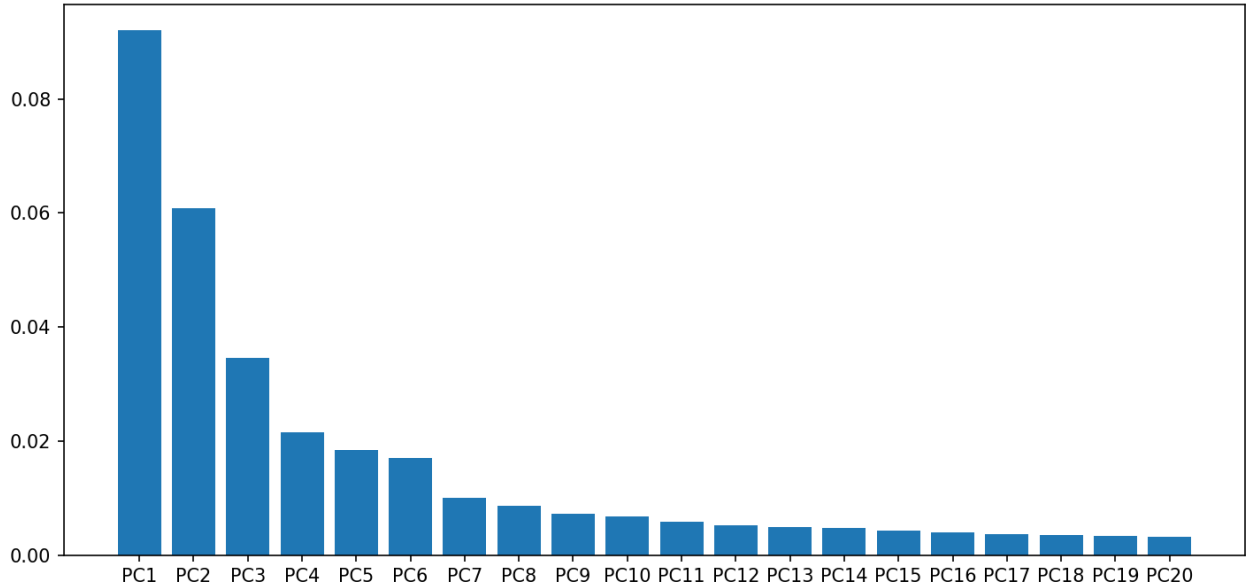

Explained variance (ratio) by each Principal Component (PC)



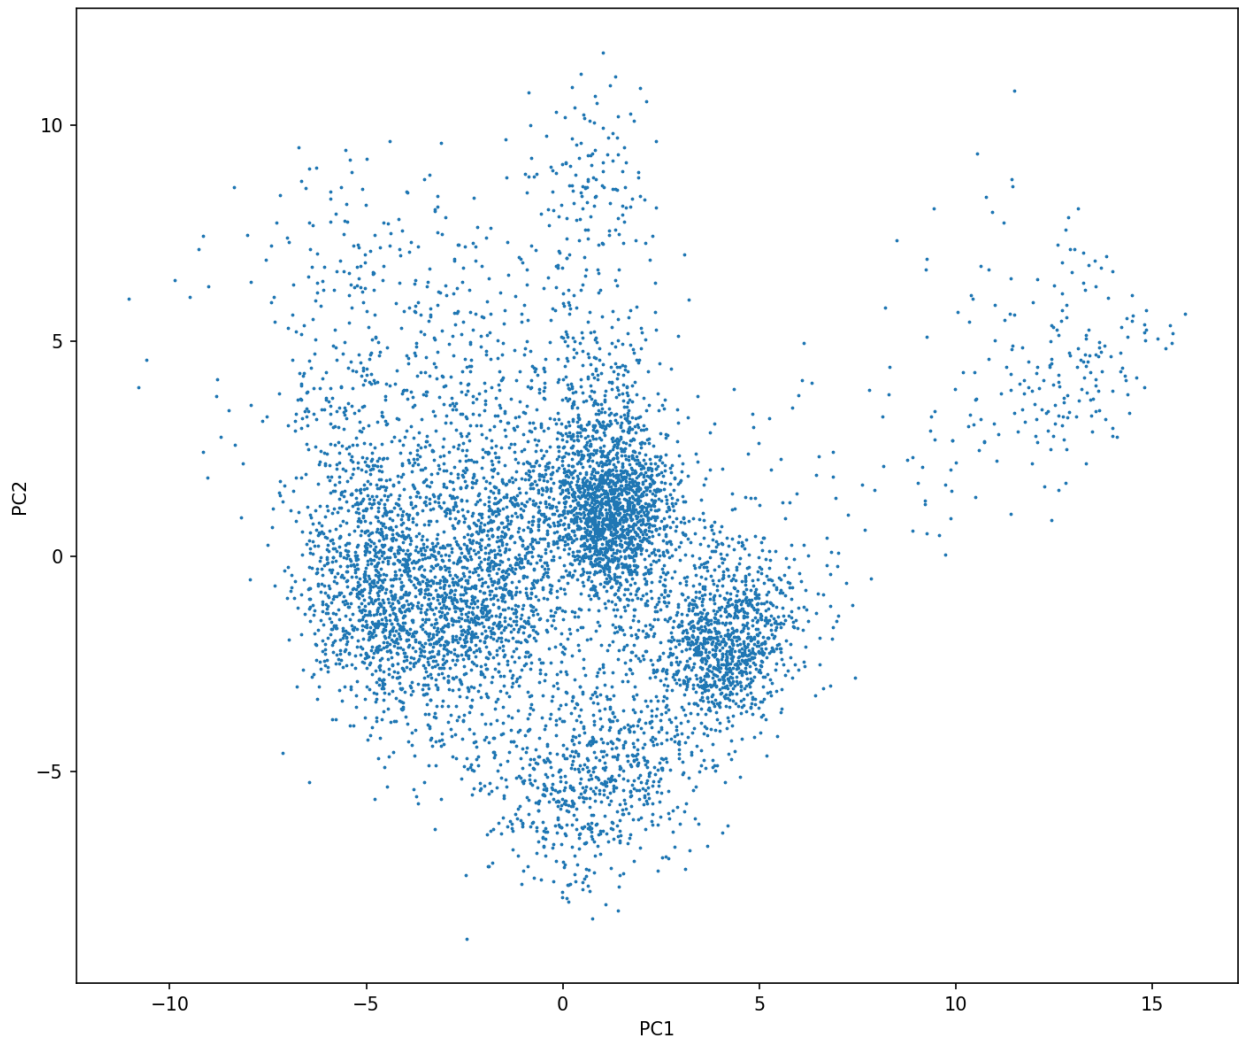

PC1 vs. PC2

# t-Distributed Stochastic Neighbor Embedding 1.0.0

Random seed: **56143**

Assay: **Log transformed assay** (from step 5: Log transformation 1.0.0)

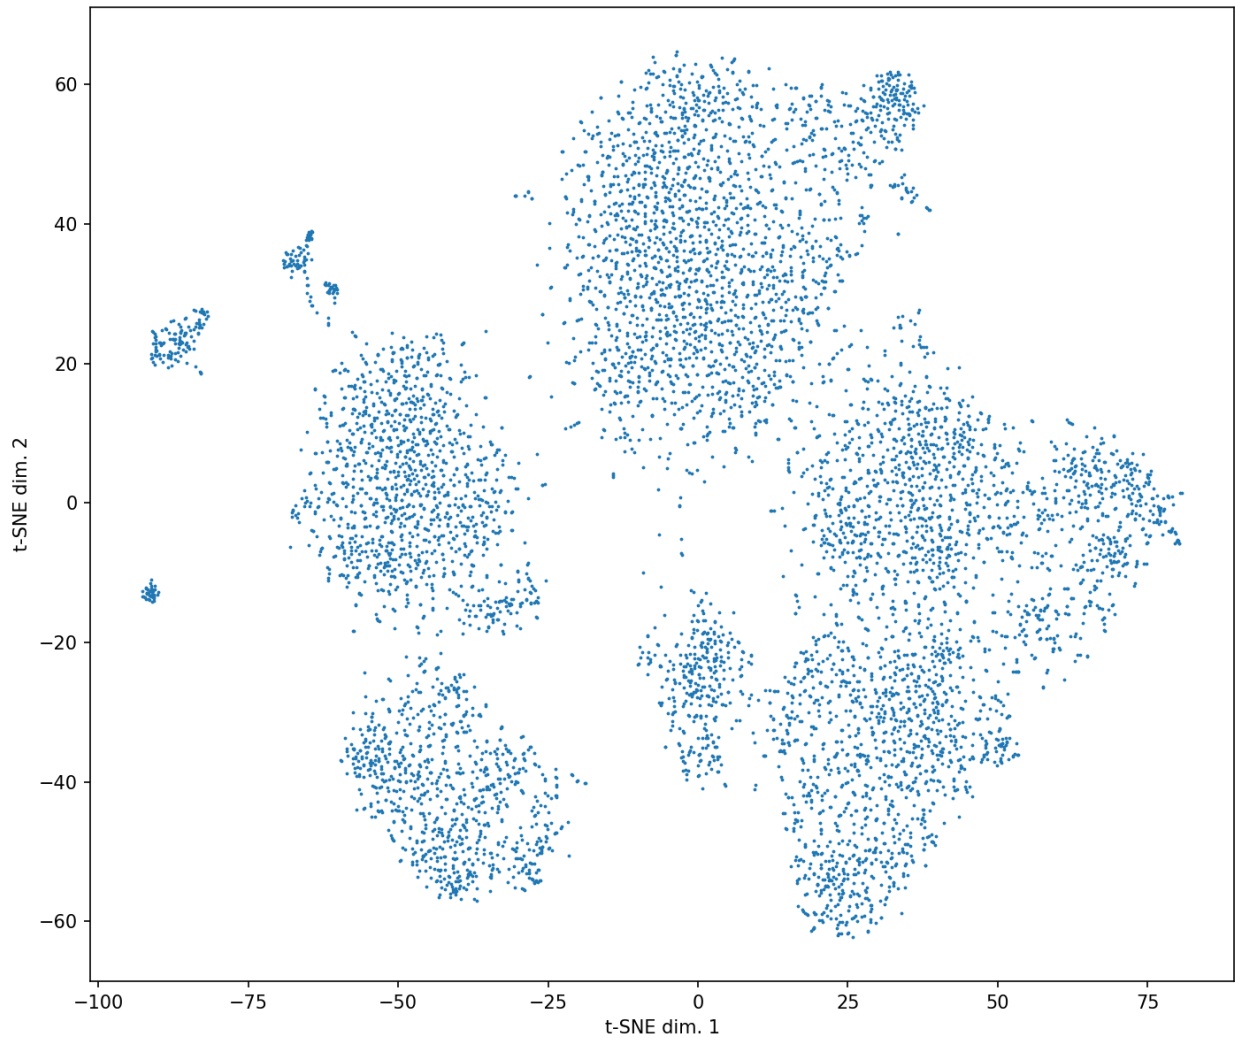

t-SNE plot: each dot represents a cell

# UMAP 1.0.0

Number of neighbors (n\_neighbors, an integer): **15**

Minimum distance (min\_dist, a real number ranges from 0 to 1): **0.1**

Metric (metric): **"euclidean"**

Assay: **Log transformed assay** (from step 5: Log transformation 1.0.0)

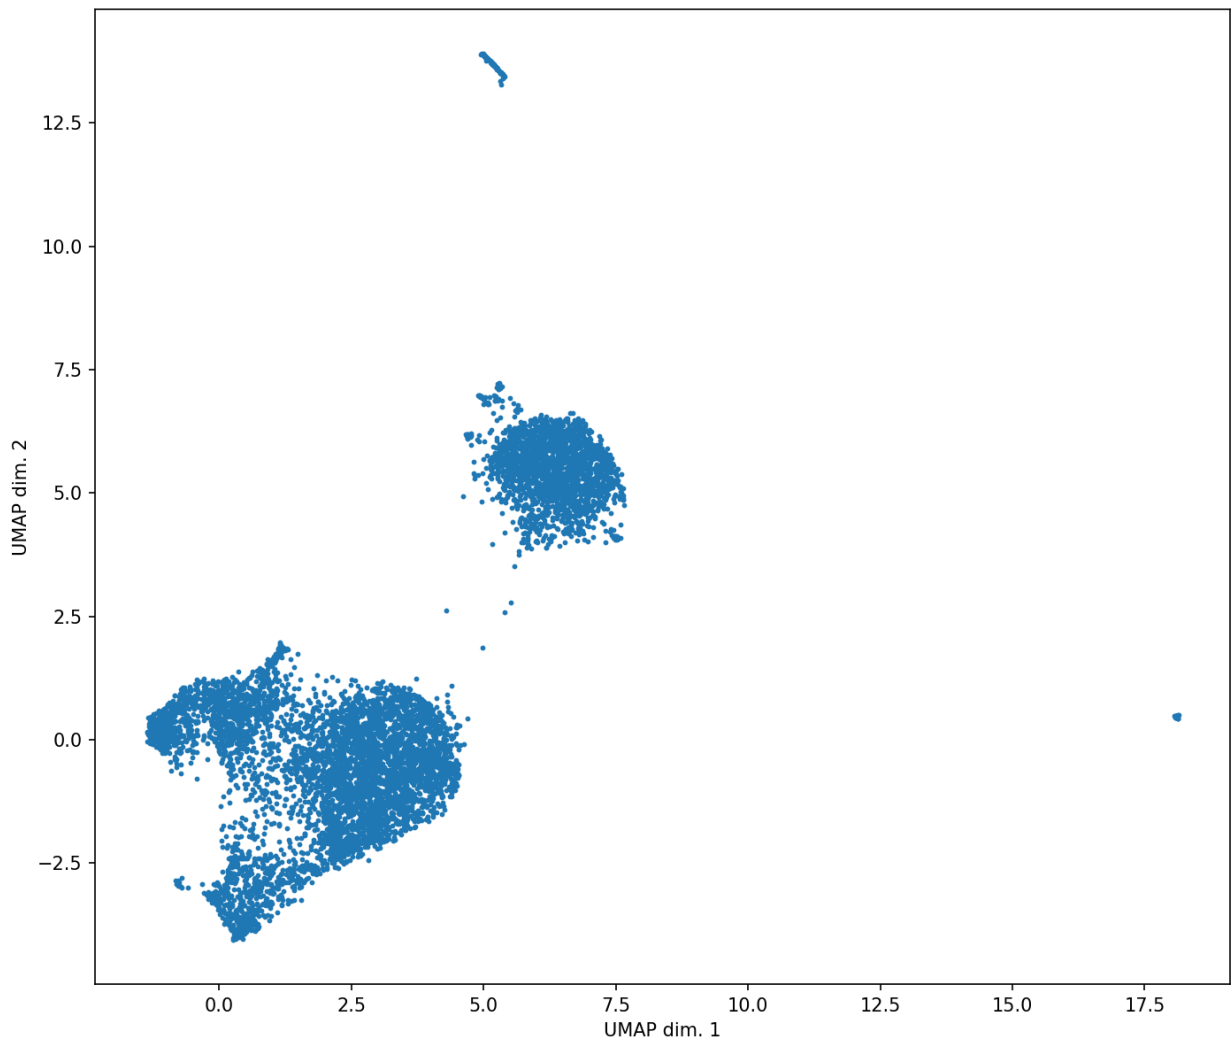

UMAP plot: each dot represents a cell

# ScanpyClustering 1.0.0

Random seed: **13513**

Assay including matrix and genelds: **Log transformed assay** (from step 5: Log transformation 1.0.0)

Cell coordinates for visualization: **PC1 vs. PC2** (from step 6: Principal Component Analysis 1.0.0)

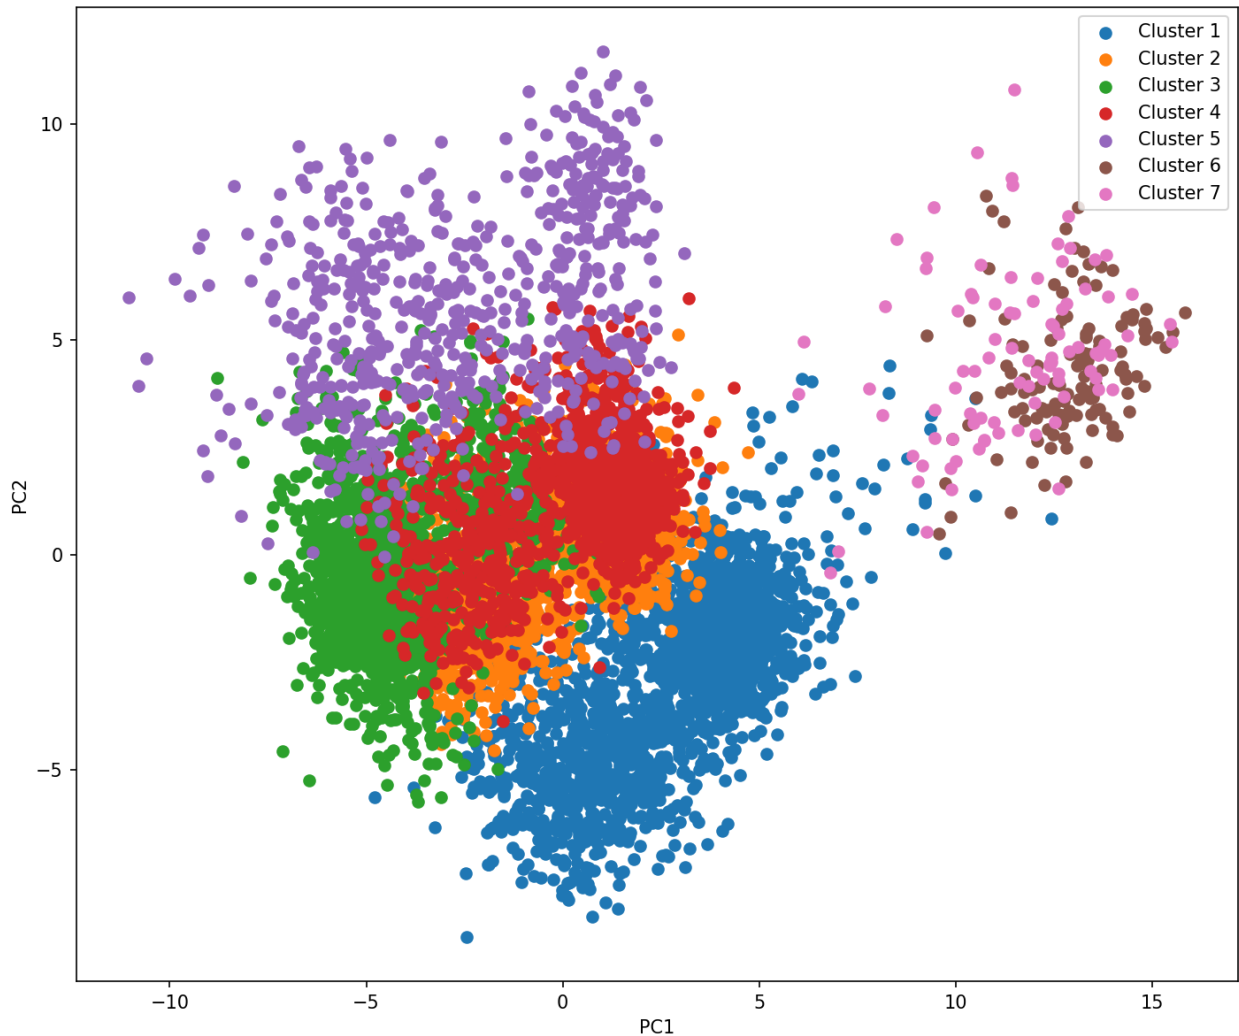

Scatter-plot using imported cell coordinates. Each dot represents a cell. The colors indicate the identified cell clusters.

# ScanpyClustering 1.0.0

Random seed: **13513**

Assay including matrix and geneIds: **Log transformed assay** (from step 5: Log transformation 1.0.0)

Cell coordinates for visualization: **t-SNE coordinates** (from step 7: t-Distributed Stochastic Neighbor Embedding 1.0.0)

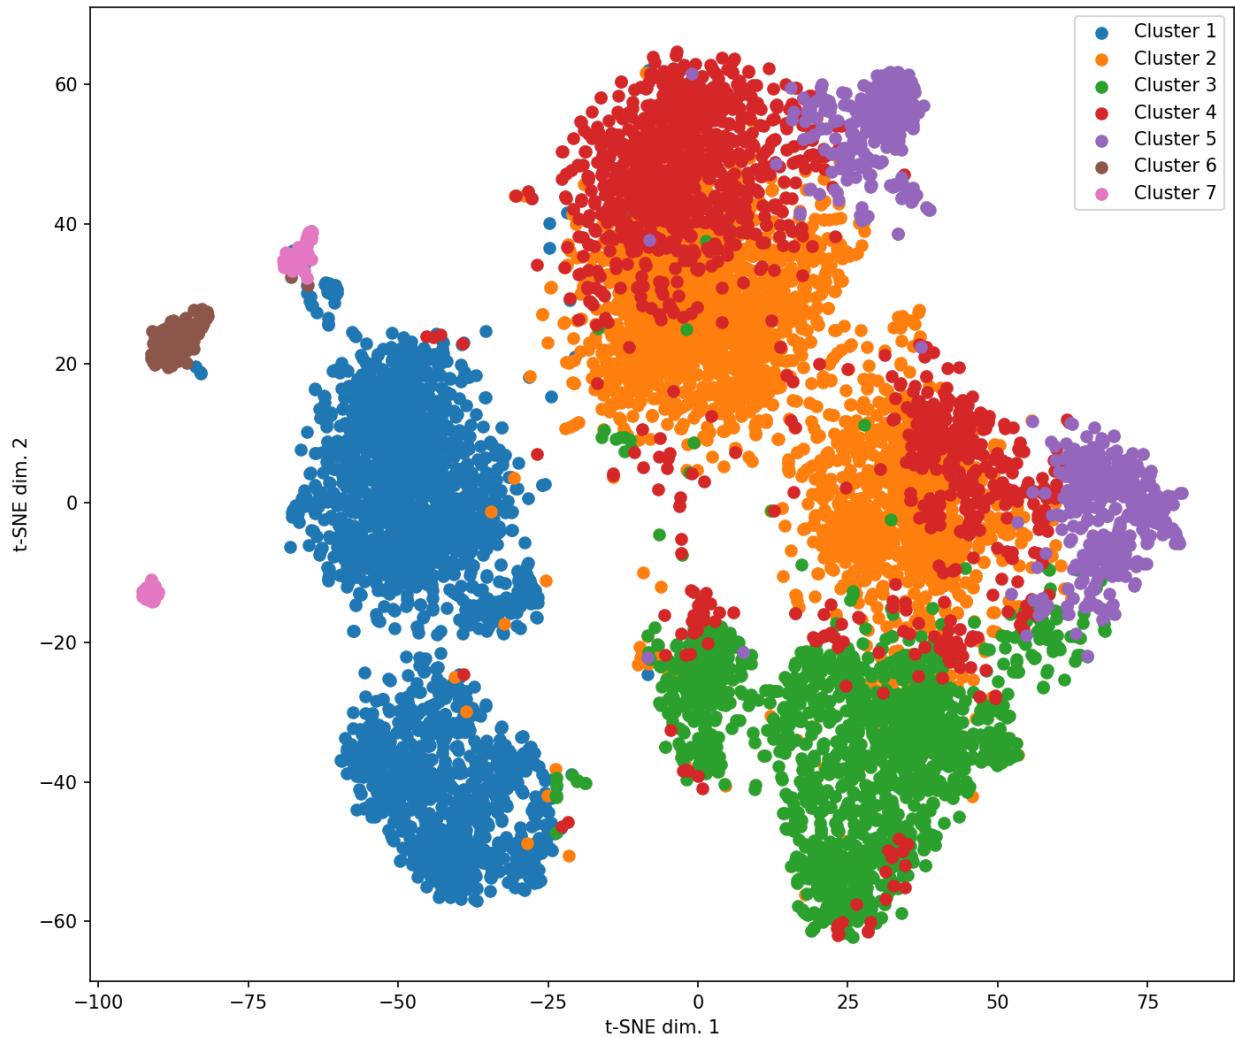

Scatter-plot using imported cell coordinates. Each dot represents a cell. The colors indicate the identified cell clusters.

# ScanpyClustering 1.0.0

Random seed: **13513**

Cell coordinates for visualization: **UMAP coordinates** (from step 8: UMAP 1.0.0)

Assay including matrix and genelds: **Log transformed assay** (from step 5: Log transformation 1.0.0)

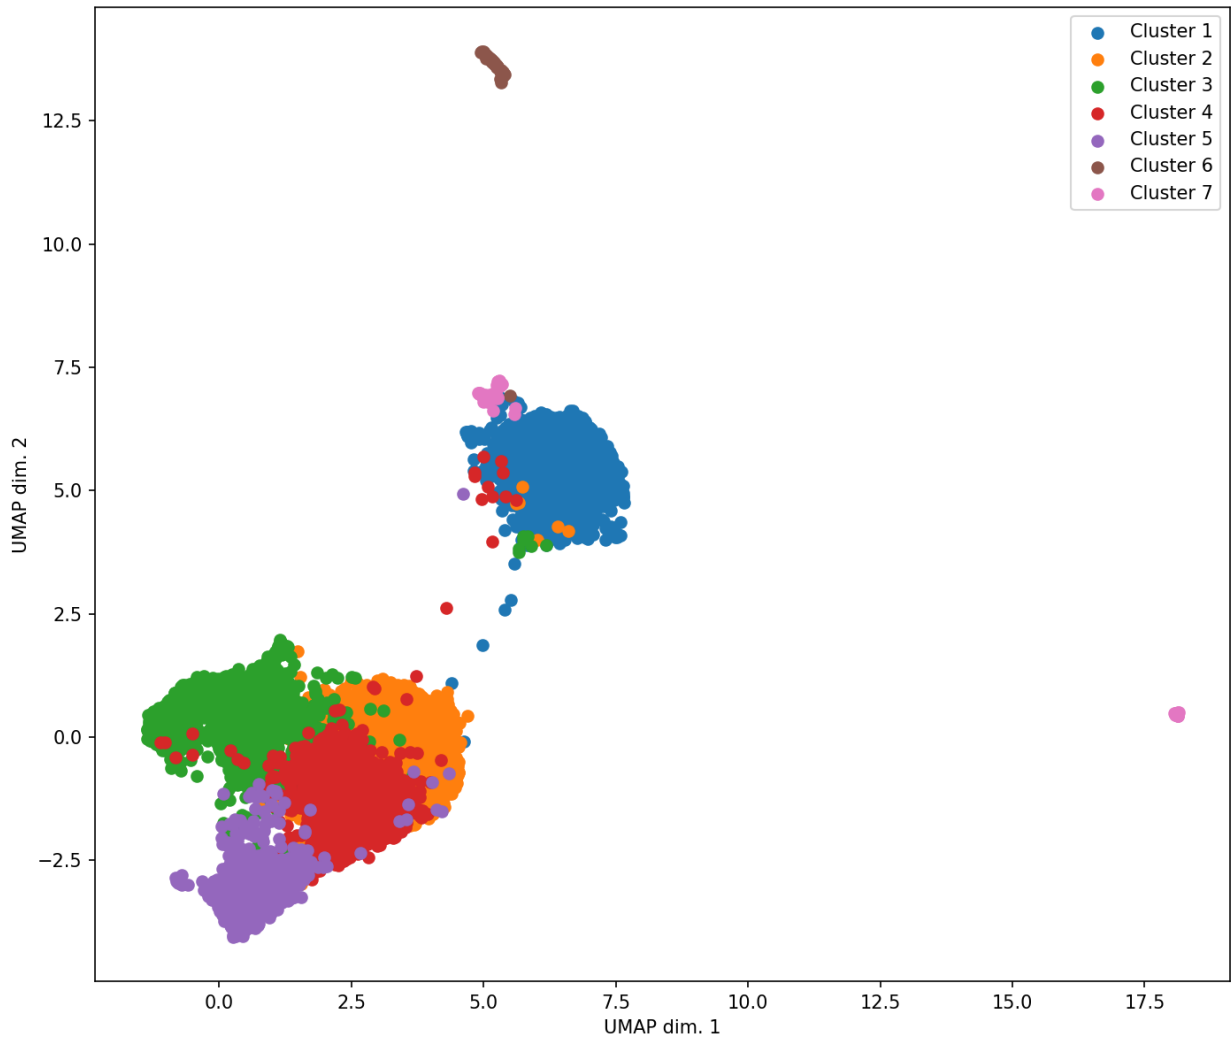

Scatter-plot using imported cell coordinates. Each dot represents a cell. The colors indicate the identified cell clusters.

# Marker Genes Identification 1.0.0

Group vector: **Cluster assignment** (from step 11: ScanpyClustering 1.0.0)

Assay including matrix and genelds: **Log transformed assay** (from step 5: Log transformation 1.0.0)

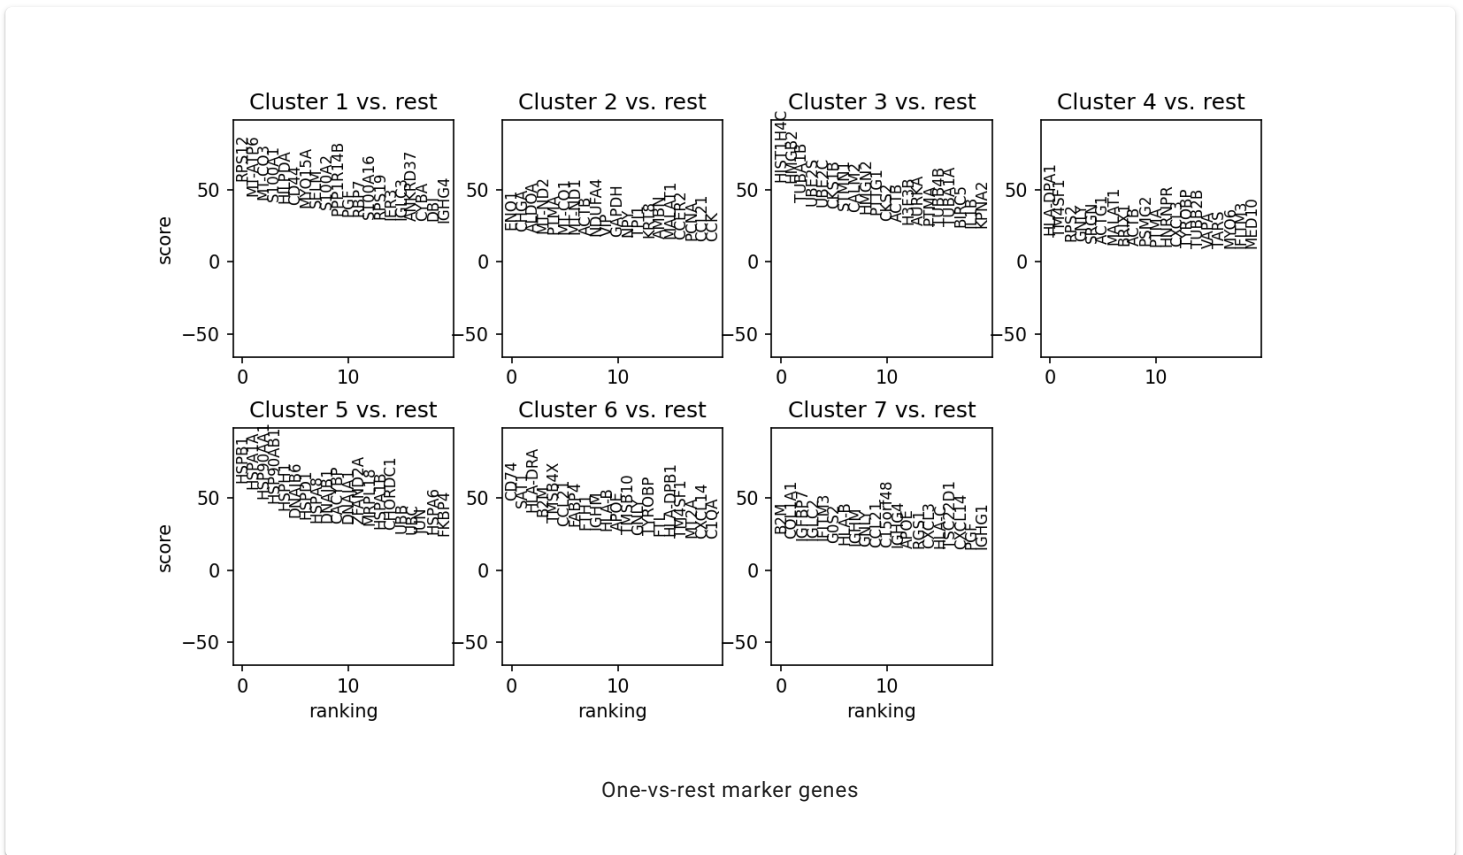

# Broad GSEA 1.0.0

The species: **"human"**

The database for the enrichment analysis: **"kegg"**

Number of repeats for calculating p-values: **1000**

A list of genes with their scores (usually output from scanpy scoring for example): **Marker score (Cluster 1 vs. rest)** (from step 12: Marker Genes Identification 1.0.0)

| gset_name         | gset_size | nes          | p_val | fdr       |
|-------------------|-----------|--------------|-------|-----------|
| KEGG_ANTIGEN_PRO  | 30        | 2.4183472526 | 0.001 | 0.063     |
| KEGG_MAPK_SIGNAL  | 45        | 2.242569416  | 0.005 | 0.105     |
| KEGG_VIRAL_MYOCA  | 25        | 2.459714285  | 0.005 | 0.105     |
| KEGG_PATHOGENIC_  | 14        | 2.5451885223 | 0.007 | 0.11025   |
| KEGG_REGULATION_  | 25        | 2.3859803876 | 0.01  | 0.126     |
| KEGG_GLYCOLYSIS_C | 13        | 2.3783434423 | 0.021 | 0.189     |
| KEGG_TYPE_I_DIABE | 17        | 2.3151470657 | 0.021 | 0.189     |
| KEGG_TIGHT_JUNCT  | 16        | 2.3476164319 | 0.035 | 0.275625  |
| KEGG_GRAFT_VERSL  | 19        | 2.1367696417 | 0.047 | 0.2953125 |



# Broad GSEA 1.0.0

The species: **"human"**

The database for the enrichment analysis: **"kegg"**

Number of repeats for calculating p-values: **1000**

A list of genes with their scores (usually output from scanpy scoring for example): **Marker score (Cluster 2 vs. rest)** (from step 12: Marker Genes Identification 1.0.0)

| gset_name         | gset_size | nes          | p_val | fdr     |
|-------------------|-----------|--------------|-------|---------|
| KEGG_GLYCOLYSIS_C | 13        | 4.2332424448 | 0     | 0       |
| KEGG_PATHOGENIC_  | 14        | 3.6287072467 | 0     | 0       |
| KEGG_ALZHEIMERS_  | 20        | 3.969936     | 0     | 0       |
| KEGG_TIGHT_JUNCT  | 16        | 3.0309404996 | 0.004 | 0.063   |
| KEGG_HUNTINGTON:  | 16        | 2.8748446055 | 0.009 | 0.1134  |
| KEGG_REGULATION_  | 25        | 2.3360851389 | 0.036 | 0.324   |
| KEGG_PARKINSONS_  | 12        | 2.5324904944 | 0.036 | 0.324   |
| KEGG_UBIQUITIN_ME | 12        | 2.3614030539 | 0.054 | 0.42525 |
| KEGG_OOCYTE_MEIC  | 15        | 2.1520125214 | 0.08  | 0.56    |

# Broad GSEA 1.0.0

The species: **"human"**

The database for the enrichment analysis: **"kegg"**

Number of repeats for calculating p-values: **1000**

A list of genes with their scores (usually output from scanpy scoring for example): **Marker score (Cluster 3 vs. rest)** (from step 12: Marker Genes Identification 1.0.0)

| gset_name         | gset_size | nes          | p_val | fdr   |
|-------------------|-----------|--------------|-------|-------|
| KEGG_OOCYTE_MEIC  | 15        | 3.9142438048 | 0     | 0     |
| KEGG_PATHOGENIC_  | 14        | 3.6276032782 | 0.001 | 0.021 |
| KEGG_UBIQUITIN_ME | 12        | 3.2339121482 | 0.001 | 0.021 |
| KEGG_CELL_CYCLE   | 20        | 3.0585714514 | 0.004 | 0.063 |
| KEGG_REGULATION_  | 25        | 2.3460916724 | 0.039 | 0.35  |
| KEGG_ANTIGEN_PRO  | 30        | 2.2842579982 | 0.04  | 0.35  |
| KEGG_INSULIN_SIGN | 12        | 2.5842161078 | 0.05  | 0.35  |
| KEGG_TIGHT_JUNCT  | 16        | 2.4147621326 | 0.05  | 0.35  |
| KEGG_ALLOGRAFT_R  | 17        | 2.3470481376 | 0.06  | 0.35  |

# Broad GSEA 1.0.0

The species: **"human"**

The database for the enrichment analysis: **"go"**

Number of repeats for calculating p-values: **1000**

A list of genes with their scores (usually output from scanpy scoring for example): **Marker score (Cluster 1 vs. rest)** (from step 12: Marker Genes Identification 1.0.0)

| gset_name         | gset_size | nes          | p_val | fdr |
|-------------------|-----------|--------------|-------|-----|
| GO_CONDENSED_CH   | 17        | 2.7298822377 | 0     | 0   |
| GO_REGULATION_OF  | 139       | 1.9514943306 | 0     | 0   |
| GO_RNA_BINDING    | 138       | 2.0809844395 | 0     | 0   |
| GO_CONDENSED_CH   | 24        | 2.8174020056 | 0     | 0   |
| GO_ESTABLISHMENT  | 152       | 1.8743619136 | 0     | 0   |
| GO_REGULATION_OF  | 23        | 2.7517004946 | 0     | 0   |
| GO_MITOTIC_SISTER | 16        | 2.6126316537 | 0     | 0   |
| GO_MICROTUBULE_C  | 43        | 2.3322495613 | 0     | 0   |
| GO_REGULATION_OF  | 87        | 2.3645791588 | 0     | 0   |

# Broad GSEA 1.0.0

The species: **"human"**

The database for the enrichment analysis: **"go"**

Number of repeats for calculating p-values: **1000**

A list of genes with their scores (usually output from scanpy scoring for example): **Marker score (Cluster 2 vs. rest)** (from step 12: Marker Genes Identification 1.0.0)

| gset_name         | gset_size | nes          | p_val | fdr |
|-------------------|-----------|--------------|-------|-----|
| GO_CALCIIUM_DEPEN | 12        | 3.4634105437 | 0     | 0   |
| GO_CELL_PROJECTIC | 139       | 2.3612219797 | 0     | 0   |
| GO_GLUCOSE_METAI  | 21        | 3.4714676181 | 0     | 0   |
| GO_OXIDATION_REDI | 78        | 2.8874490122 | 0     | 0   |
| GO_NEGATIVE_REGU  | 14        | 3.5490548993 | 0     | 0   |
| GO_ACTIN_FILAMEN  | 50        | 2.7609463215 | 0     | 0   |
| GO_PURINE_CONTAI  | 35        | 3.6790812319 | 0     | 0   |
| GO_STRUCTURAL_CC  | 18        | 3.8285672551 | 0     | 0   |
| GO_CARBOHYDRATE   | 54        | 2.6840172988 | 0     | 0   |

# Broad GSEA 1.0.0

The species: **"human"**

The database for the enrichment analysis: **"go"**

Number of repeats for calculating p-values: **1000**

A list of genes with their scores (usually output from scanpy scoring for example): **Marker score (Cluster 3 vs. rest)** (from step 12: Marker Genes Identification 1.0.0)

| gset_name         | gset_size | nes          | p_val | fdr |
|-------------------|-----------|--------------|-------|-----|
| GO_NEGATIVE_REGU  | 88        | 2.5290871941 | 0     | 0   |
| GO_ADENYL_NUCLEC  | 110       | 2.4677889845 | 0     | 0   |
| GO_POSITIVE_REGUL | 17        | 4.0281776068 | 0     | 0   |
| GO_ORGANELLE_FIS  | 46        | 4.3648616611 | 0     | 0   |
| GO_CHROMATIN_ORI  | 34        | 3.3637933508 | 0     | 0   |
| GO_DNA_PACKAGINC  | 18        | 3.6002319314 | 0     | 0   |
| GO_SPINDLE_POLE   | 16        | 4.015371666  | 0     | 0   |
| GO_CHROMATIN      | 38        | 3.2656739887 | 0     | 0   |
| GO_POSITIVE_REGUL | 83        | 2.5615805609 | 0     | 0   |

# Pseudotime construction 1.0.0

Number of neighbors to calculate: **20**

Method for computing connectivities: **"gauss"**

The input assay to use: **Log transformed assay** (from step 5: Log transformation 1.0.0)

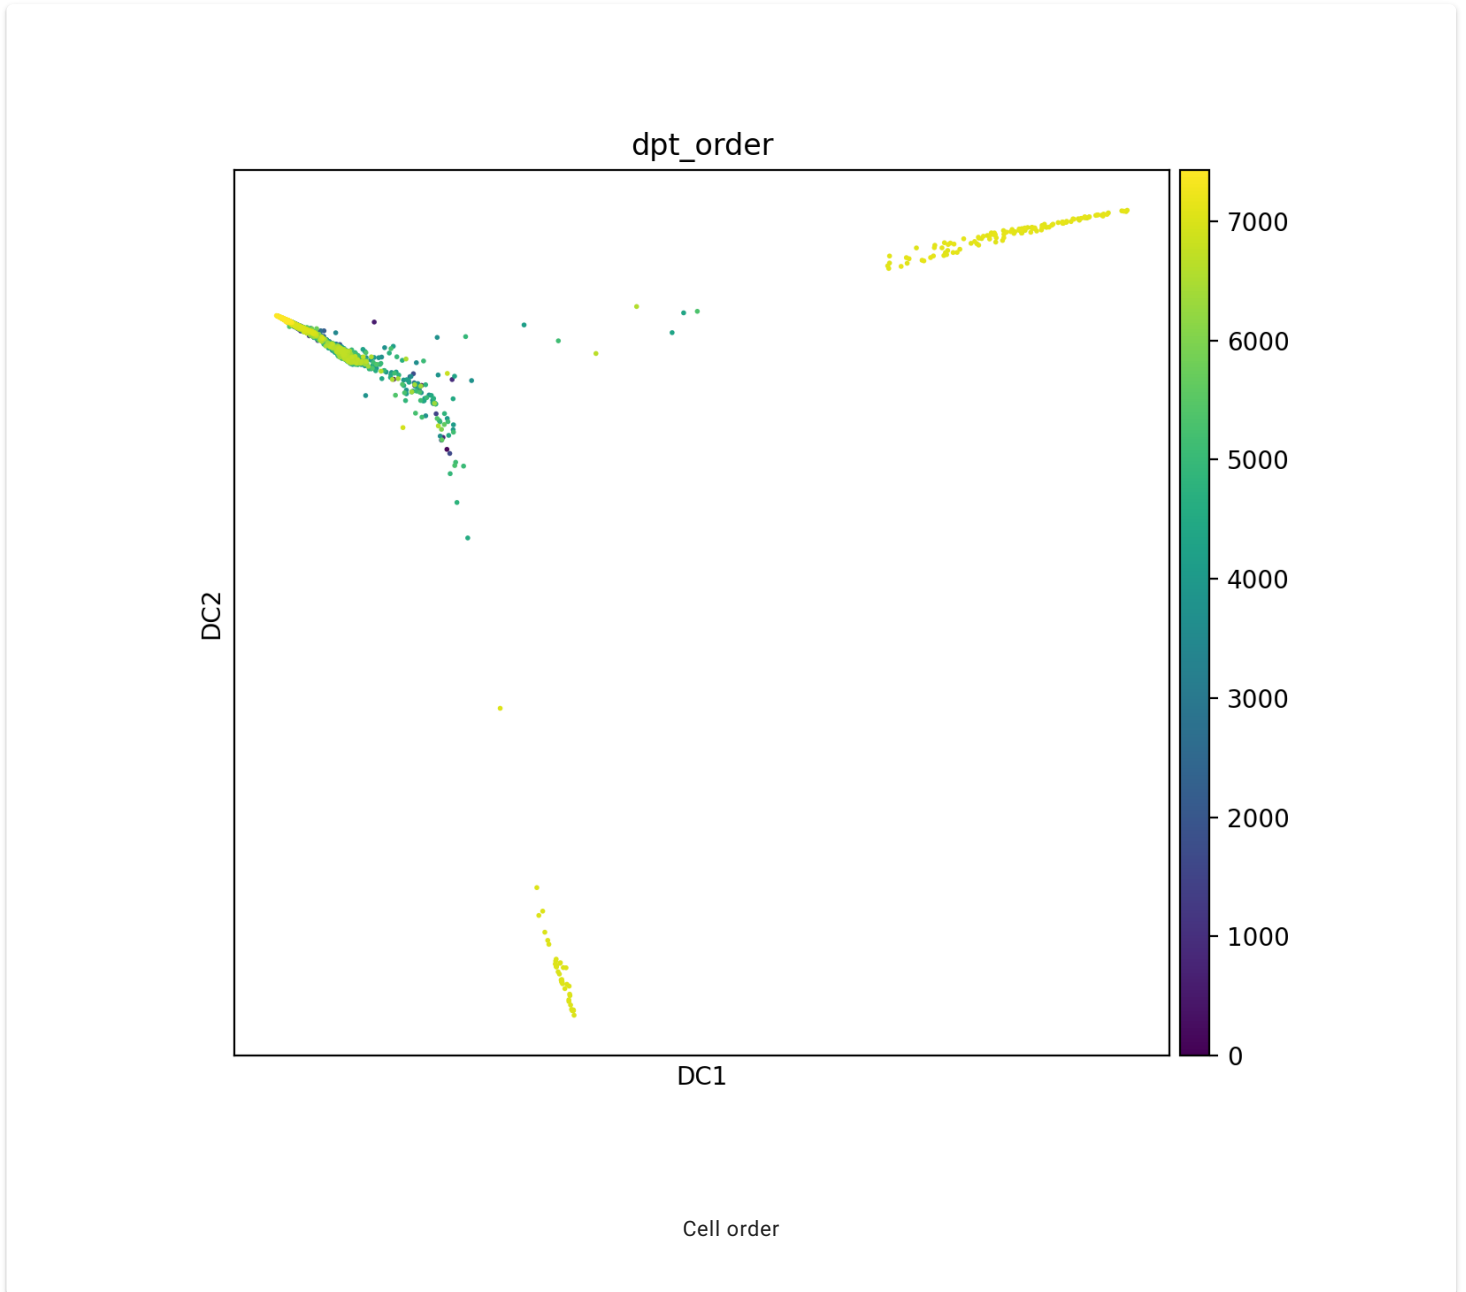

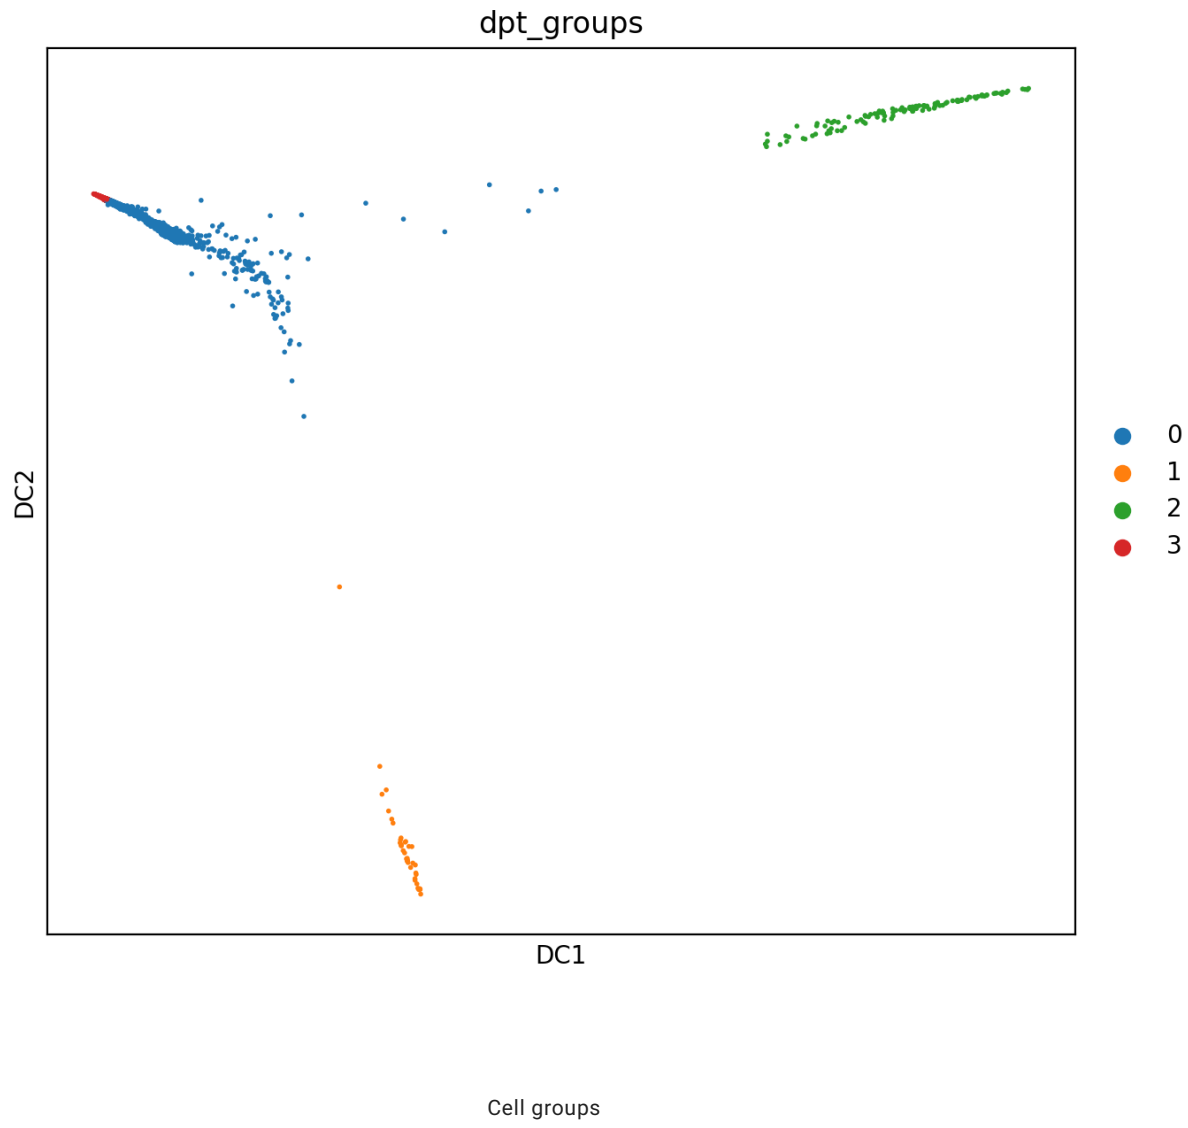

Use the browser back button to return to the project steps.
