# Supplementary material for: GranatumX: A Community-engaging, Modularized, and Flexible Webtool for Single-cell Data Analysis
Source: bioRxiv or medRxiv preprint supplement (doi:10.1101/385591), 2021-07-01

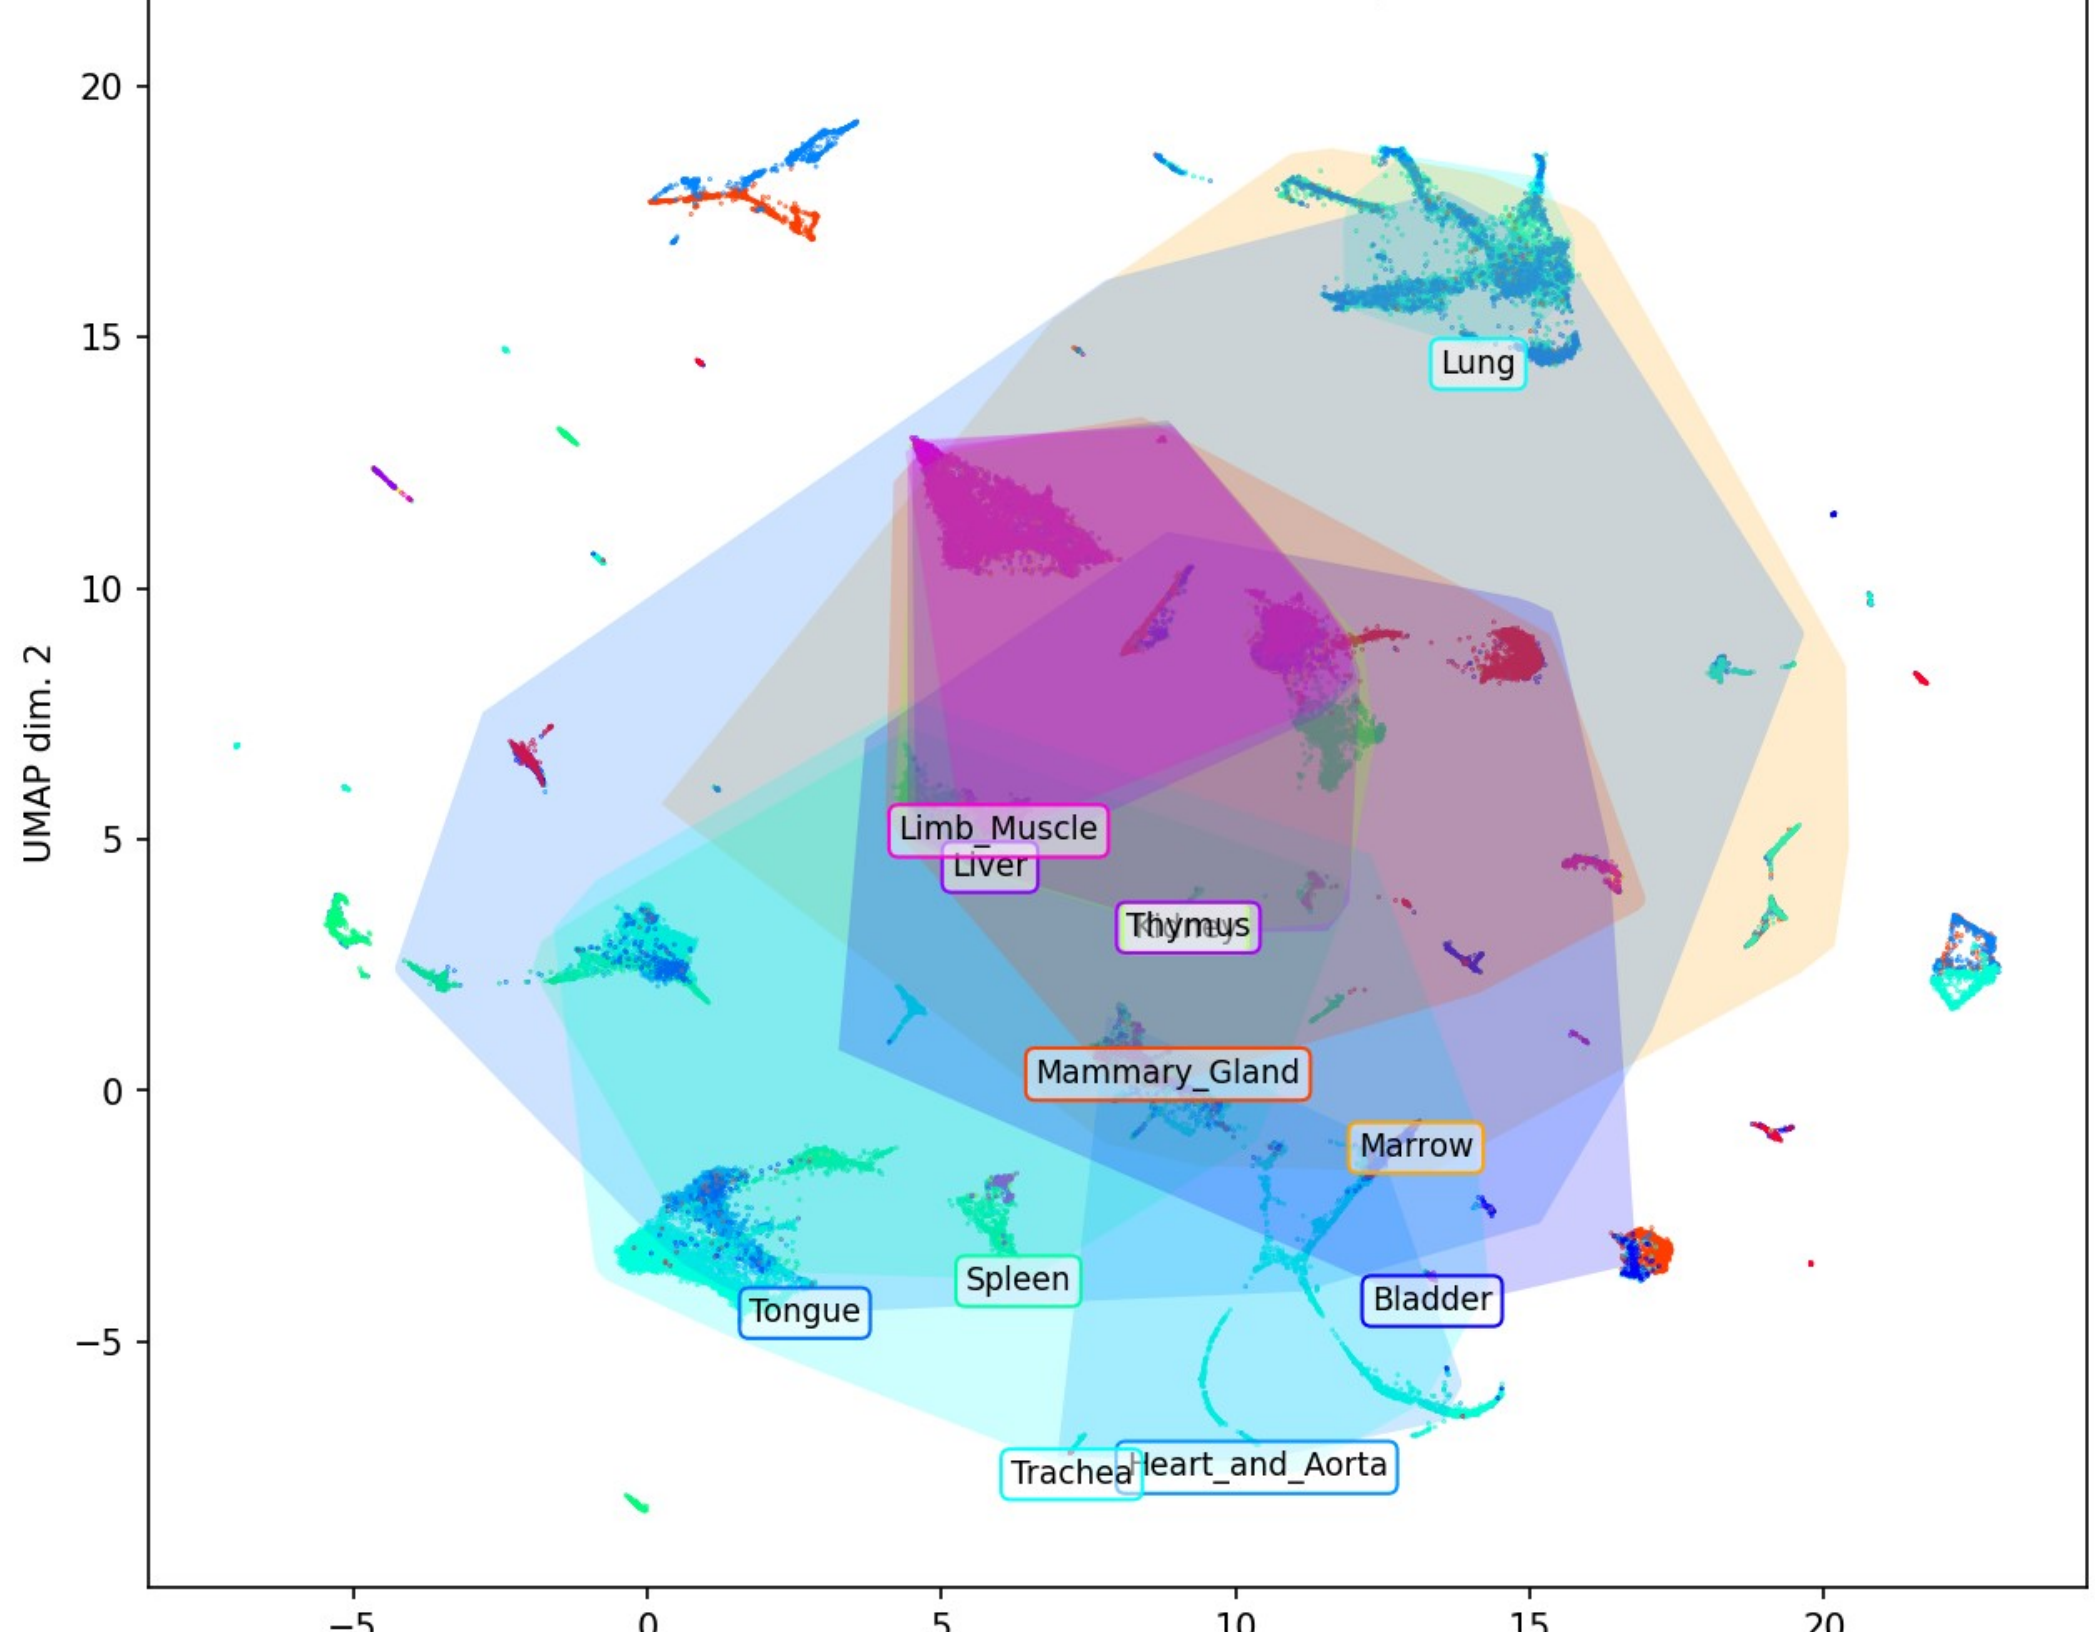

Supplement: Supplementary file [file media-5.pdf]
